# Supplementary material for: Gas phase conversion of eugenol into various hydrocarbons and platform chemicals
Source: Royal Society of Chemistry journal article supplement (doi:10.1039/c6ra26357g), 2017-01-01
Supplement: c6ra26357g1.pdf [file c6ra26357g1.pdf]

**Supplementary Table 1.** The optimized molecular structure, Cartesian coordinates, electronic energy added with zero point vibrational energy (ZPVE), ZPVE, and spin multiplicity of **EUG**, **1\_a**, **1\_b**, **1\_b\***, **TS1\_1**, **1\_c**, and **1\_d** structures in gas phase environment at B3LYP/6-311+g(d,p) level of theory.

| S. No. | Structure Notation | Structure                                                                         | x-y-z coordinates                                                                                                                                                                                                                                                                                                                                                                                                                                                                                                                                                                                                                                                                                                                                                                                                                                                                                                                                                                                                                                                                                                                                                                                                                                                                                                                                                                                                                                                                                                                                                                                                                                                                                                                                                                                                                                                                                                                                                                                                                                                                                                                                            | Electronic Energy with ZPVE | ZPVEs  | Spin Multiplicity |   |   |   |   |          |          |          |   |   |         |          |          |   |   |          |          |          |   |   |          |          |         |   |   |          |         |          |   |   |          |         |          |   |   |         |          |          |   |   |          |          |          |   |   |          |          |          |    |   |          |         |          |    |   |          |          |          |    |   |          |          |         |    |   |          |          |          |    |   |          |          |          |    |   |          |          |          |    |   |         |          |          |    |   |         |          |          |    |   |          |          |          |    |   |          |          |          |    |   |        |          |          |    |   |          |          |        |    |   |         |          |          |    |   |         |          |          |    |   |          |        |          |             |          |   |
|--------|--------------------|-----------------------------------------------------------------------------------|--------------------------------------------------------------------------------------------------------------------------------------------------------------------------------------------------------------------------------------------------------------------------------------------------------------------------------------------------------------------------------------------------------------------------------------------------------------------------------------------------------------------------------------------------------------------------------------------------------------------------------------------------------------------------------------------------------------------------------------------------------------------------------------------------------------------------------------------------------------------------------------------------------------------------------------------------------------------------------------------------------------------------------------------------------------------------------------------------------------------------------------------------------------------------------------------------------------------------------------------------------------------------------------------------------------------------------------------------------------------------------------------------------------------------------------------------------------------------------------------------------------------------------------------------------------------------------------------------------------------------------------------------------------------------------------------------------------------------------------------------------------------------------------------------------------------------------------------------------------------------------------------------------------------------------------------------------------------------------------------------------------------------------------------------------------------------------------------------------------------------------------------------------------|-----------------------------|--------|-------------------|---|---|---|---|----------|----------|----------|---|---|---------|----------|----------|---|---|----------|----------|----------|---|---|----------|----------|---------|---|---|----------|---------|----------|---|---|----------|---------|----------|---|---|---------|----------|----------|---|---|----------|----------|----------|---|---|----------|----------|----------|----|---|----------|---------|----------|----|---|----------|----------|----------|----|---|----------|----------|---------|----|---|----------|----------|----------|----|---|----------|----------|----------|----|---|----------|----------|----------|----|---|---------|----------|----------|----|---|---------|----------|----------|----|---|----------|----------|----------|----|---|----------|----------|----------|----|---|--------|----------|----------|----|---|----------|----------|--------|----|---|---------|----------|----------|----|---|---------|----------|----------|----|---|----------|--------|----------|-------------|----------|---|
| 1.     | EUG                | 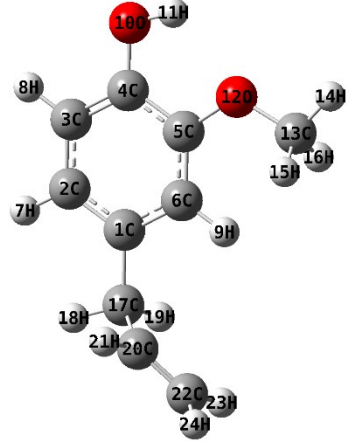 | <table border="1"> <thead> <tr> <th>Tag</th> <th>Symbol</th> <th>X</th> <th>Y</th> <th>Z</th> </tr> </thead> <tbody> <tr><td>1</td><td>C</td><td>0.921847</td><td>-0.81144</td><td>-0.25298</td></tr> <tr><td>2</td><td>C</td><td>0.22401</td><td>-2.00746</td><td>-0.10414</td></tr> <tr><td>3</td><td>C</td><td>-1.16244</td><td>-2.01827</td><td>0.071398</td></tr> <tr><td>4</td><td>C</td><td>-1.86729</td><td>-0.82617</td><td>0.10102</td></tr> <tr><td>5</td><td>C</td><td>-1.17351</td><td>0.38958</td><td>-0.04542</td></tr> <tr><td>6</td><td>C</td><td>0.204067</td><td>0.39514</td><td>-0.21805</td></tr> <tr><td>7</td><td>H</td><td>0.76134</td><td>-2.94949</td><td>-0.12717</td></tr> <tr><td>8</td><td>H</td><td>-1.70675</td><td>-2.94789</td><td>0.187748</td></tr> <tr><td>9</td><td>H</td><td>0.739077</td><td>1.331006</td><td>-0.31993</td></tr> <tr><td>10</td><td>O</td><td>-3.22034</td><td>-0.8299</td><td>0.273338</td></tr> <tr><td>11</td><td>H</td><td>-3.52022</td><td>0.088975</td><td>0.264996</td></tr> <tr><td>12</td><td>O</td><td>-1.98317</td><td>1.498768</td><td>0.00469</td></tr> <tr><td>13</td><td>C</td><td>-1.38858</td><td>2.783784</td><td>-0.13284</td></tr> <tr><td>14</td><td>H</td><td>-2.20475</td><td>3.501092</td><td>-0.06471</td></tr> <tr><td>15</td><td>H</td><td>-0.66801</td><td>2.972635</td><td>0.669312</td></tr> <tr><td>16</td><td>H</td><td>-0.8922</td><td>2.886499</td><td>-1.10326</td></tr> <tr><td>17</td><td>C</td><td>2.42711</td><td>-0.79683</td><td>-0.46703</td></tr> <tr><td>18</td><td>H</td><td>2.790206</td><td>-1.82936</td><td>-0.40995</td></tr> <tr><td>19</td><td>H</td><td>2.660078</td><td>-0.44086</td><td>-1.47759</td></tr> <tr><td>20</td><td>C</td><td>3.1732</td><td>0.042306</td><td>0.537084</td></tr> <tr><td>21</td><td>H</td><td>3.021549</td><td>-0.22728</td><td>1.5809</td></tr> <tr><td>22</td><td>C</td><td>3.97571</td><td>1.061797</td><td>0.237507</td></tr> <tr><td>23</td><td>H</td><td>4.15119</td><td>1.364179</td><td>-0.79109</td></tr> <tr><td>24</td><td>H</td><td>4.491758</td><td>1.6249</td><td>1.007203</td></tr> </tbody> </table> | Tag                         | Symbol | X                 | Y | Z | 1 | C | 0.921847 | -0.81144 | -0.25298 | 2 | C | 0.22401 | -2.00746 | -0.10414 | 3 | C | -1.16244 | -2.01827 | 0.071398 | 4 | C | -1.86729 | -0.82617 | 0.10102 | 5 | C | -1.17351 | 0.38958 | -0.04542 | 6 | C | 0.204067 | 0.39514 | -0.21805 | 7 | H | 0.76134 | -2.94949 | -0.12717 | 8 | H | -1.70675 | -2.94789 | 0.187748 | 9 | H | 0.739077 | 1.331006 | -0.31993 | 10 | O | -3.22034 | -0.8299 | 0.273338 | 11 | H | -3.52022 | 0.088975 | 0.264996 | 12 | O | -1.98317 | 1.498768 | 0.00469 | 13 | C | -1.38858 | 2.783784 | -0.13284 | 14 | H | -2.20475 | 3.501092 | -0.06471 | 15 | H | -0.66801 | 2.972635 | 0.669312 | 16 | H | -0.8922 | 2.886499 | -1.10326 | 17 | C | 2.42711 | -0.79683 | -0.46703 | 18 | H | 2.790206 | -1.82936 | -0.40995 | 19 | H | 2.660078 | -0.44086 | -1.47759 | 20 | C | 3.1732 | 0.042306 | 0.537084 | 21 | H | 3.021549 | -0.22728 | 1.5809 | 22 | C | 3.97571 | 1.061797 | 0.237507 | 23 | H | 4.15119 | 1.364179 | -0.79109 | 24 | H | 4.491758 | 1.6249 | 1.007203 | -538.658834 | 0.197726 | 1 |
| Tag    | Symbol             | X                                                                                 | Y                                                                                                                                                                                                                                                                                                                                                                                                                                                                                                                                                                                                                                                                                                                                                                                                                                                                                                                                                                                                                                                                                                                                                                                                                                                                                                                                                                                                                                                                                                                                                                                                                                                                                                                                                                                                                                                                                                                                                                                                                                                                                                                                                            | Z                           |        |                   |   |   |   |   |          |          |          |   |   |         |          |          |   |   |          |          |          |   |   |          |          |         |   |   |          |         |          |   |   |          |         |          |   |   |         |          |          |   |   |          |          |          |   |   |          |          |          |    |   |          |         |          |    |   |          |          |          |    |   |          |          |         |    |   |          |          |          |    |   |          |          |          |    |   |          |          |          |    |   |         |          |          |    |   |         |          |          |    |   |          |          |          |    |   |          |          |          |    |   |        |          |          |    |   |          |          |        |    |   |         |          |          |    |   |         |          |          |    |   |          |        |          |             |          |   |
| 1      | C                  | 0.921847                                                                          | -0.81144                                                                                                                                                                                                                                                                                                                                                                                                                                                                                                                                                                                                                                                                                                                                                                                                                                                                                                                                                                                                                                                                                                                                                                                                                                                                                                                                                                                                                                                                                                                                                                                                                                                                                                                                                                                                                                                                                                                                                                                                                                                                                                                                                     | -0.25298                    |        |                   |   |   |   |   |          |          |          |   |   |         |          |          |   |   |          |          |          |   |   |          |          |         |   |   |          |         |          |   |   |          |         |          |   |   |         |          |          |   |   |          |          |          |   |   |          |          |          |    |   |          |         |          |    |   |          |          |          |    |   |          |          |         |    |   |          |          |          |    |   |          |          |          |    |   |          |          |          |    |   |         |          |          |    |   |         |          |          |    |   |          |          |          |    |   |          |          |          |    |   |        |          |          |    |   |          |          |        |    |   |         |          |          |    |   |         |          |          |    |   |          |        |          |             |          |   |
| 2      | C                  | 0.22401                                                                           | -2.00746                                                                                                                                                                                                                                                                                                                                                                                                                                                                                                                                                                                                                                                                                                                                                                                                                                                                                                                                                                                                                                                                                                                                                                                                                                                                                                                                                                                                                                                                                                                                                                                                                                                                                                                                                                                                                                                                                                                                                                                                                                                                                                                                                     | -0.10414                    |        |                   |   |   |   |   |          |          |          |   |   |         |          |          |   |   |          |          |          |   |   |          |          |         |   |   |          |         |          |   |   |          |         |          |   |   |         |          |          |   |   |          |          |          |   |   |          |          |          |    |   |          |         |          |    |   |          |          |          |    |   |          |          |         |    |   |          |          |          |    |   |          |          |          |    |   |          |          |          |    |   |         |          |          |    |   |         |          |          |    |   |          |          |          |    |   |          |          |          |    |   |        |          |          |    |   |          |          |        |    |   |         |          |          |    |   |         |          |          |    |   |          |        |          |             |          |   |
| 3      | C                  | -1.16244                                                                          | -2.01827                                                                                                                                                                                                                                                                                                                                                                                                                                                                                                                                                                                                                                                                                                                                                                                                                                                                                                                                                                                                                                                                                                                                                                                                                                                                                                                                                                                                                                                                                                                                                                                                                                                                                                                                                                                                                                                                                                                                                                                                                                                                                                                                                     | 0.071398                    |        |                   |   |   |   |   |          |          |          |   |   |         |          |          |   |   |          |          |          |   |   |          |          |         |   |   |          |         |          |   |   |          |         |          |   |   |         |          |          |   |   |          |          |          |   |   |          |          |          |    |   |          |         |          |    |   |          |          |          |    |   |          |          |         |    |   |          |          |          |    |   |          |          |          |    |   |          |          |          |    |   |         |          |          |    |   |         |          |          |    |   |          |          |          |    |   |          |          |          |    |   |        |          |          |    |   |          |          |        |    |   |         |          |          |    |   |         |          |          |    |   |          |        |          |             |          |   |
| 4      | C                  | -1.86729                                                                          | -0.82617                                                                                                                                                                                                                                                                                                                                                                                                                                                                                                                                                                                                                                                                                                                                                                                                                                                                                                                                                                                                                                                                                                                                                                                                                                                                                                                                                                                                                                                                                                                                                                                                                                                                                                                                                                                                                                                                                                                                                                                                                                                                                                                                                     | 0.10102                     |        |                   |   |   |   |   |          |          |          |   |   |         |          |          |   |   |          |          |          |   |   |          |          |         |   |   |          |         |          |   |   |          |         |          |   |   |         |          |          |   |   |          |          |          |   |   |          |          |          |    |   |          |         |          |    |   |          |          |          |    |   |          |          |         |    |   |          |          |          |    |   |          |          |          |    |   |          |          |          |    |   |         |          |          |    |   |         |          |          |    |   |          |          |          |    |   |          |          |          |    |   |        |          |          |    |   |          |          |        |    |   |         |          |          |    |   |         |          |          |    |   |          |        |          |             |          |   |
| 5      | C                  | -1.17351                                                                          | 0.38958                                                                                                                                                                                                                                                                                                                                                                                                                                                                                                                                                                                                                                                                                                                                                                                                                                                                                                                                                                                                                                                                                                                                                                                                                                                                                                                                                                                                                                                                                                                                                                                                                                                                                                                                                                                                                                                                                                                                                                                                                                                                                                                                                      | -0.04542                    |        |                   |   |   |   |   |          |          |          |   |   |         |          |          |   |   |          |          |          |   |   |          |          |         |   |   |          |         |          |   |   |          |         |          |   |   |         |          |          |   |   |          |          |          |   |   |          |          |          |    |   |          |         |          |    |   |          |          |          |    |   |          |          |         |    |   |          |          |          |    |   |          |          |          |    |   |          |          |          |    |   |         |          |          |    |   |         |          |          |    |   |          |          |          |    |   |          |          |          |    |   |        |          |          |    |   |          |          |        |    |   |         |          |          |    |   |         |          |          |    |   |          |        |          |             |          |   |
| 6      | C                  | 0.204067                                                                          | 0.39514                                                                                                                                                                                                                                                                                                                                                                                                                                                                                                                                                                                                                                                                                                                                                                                                                                                                                                                                                                                                                                                                                                                                                                                                                                                                                                                                                                                                                                                                                                                                                                                                                                                                                                                                                                                                                                                                                                                                                                                                                                                                                                                                                      | -0.21805                    |        |                   |   |   |   |   |          |          |          |   |   |         |          |          |   |   |          |          |          |   |   |          |          |         |   |   |          |         |          |   |   |          |         |          |   |   |         |          |          |   |   |          |          |          |   |   |          |          |          |    |   |          |         |          |    |   |          |          |          |    |   |          |          |         |    |   |          |          |          |    |   |          |          |          |    |   |          |          |          |    |   |         |          |          |    |   |         |          |          |    |   |          |          |          |    |   |          |          |          |    |   |        |          |          |    |   |          |          |        |    |   |         |          |          |    |   |         |          |          |    |   |          |        |          |             |          |   |
| 7      | H                  | 0.76134                                                                           | -2.94949                                                                                                                                                                                                                                                                                                                                                                                                                                                                                                                                                                                                                                                                                                                                                                                                                                                                                                                                                                                                                                                                                                                                                                                                                                                                                                                                                                                                                                                                                                                                                                                                                                                                                                                                                                                                                                                                                                                                                                                                                                                                                                                                                     | -0.12717                    |        |                   |   |   |   |   |          |          |          |   |   |         |          |          |   |   |          |          |          |   |   |          |          |         |   |   |          |         |          |   |   |          |         |          |   |   |         |          |          |   |   |          |          |          |   |   |          |          |          |    |   |          |         |          |    |   |          |          |          |    |   |          |          |         |    |   |          |          |          |    |   |          |          |          |    |   |          |          |          |    |   |         |          |          |    |   |         |          |          |    |   |          |          |          |    |   |          |          |          |    |   |        |          |          |    |   |          |          |        |    |   |         |          |          |    |   |         |          |          |    |   |          |        |          |             |          |   |
| 8      | H                  | -1.70675                                                                          | -2.94789                                                                                                                                                                                                                                                                                                                                                                                                                                                                                                                                                                                                                                                                                                                                                                                                                                                                                                                                                                                                                                                                                                                                                                                                                                                                                                                                                                                                                                                                                                                                                                                                                                                                                                                                                                                                                                                                                                                                                                                                                                                                                                                                                     | 0.187748                    |        |                   |   |   |   |   |          |          |          |   |   |         |          |          |   |   |          |          |          |   |   |          |          |         |   |   |          |         |          |   |   |          |         |          |   |   |         |          |          |   |   |          |          |          |   |   |          |          |          |    |   |          |         |          |    |   |          |          |          |    |   |          |          |         |    |   |          |          |          |    |   |          |          |          |    |   |          |          |          |    |   |         |          |          |    |   |         |          |          |    |   |          |          |          |    |   |          |          |          |    |   |        |          |          |    |   |          |          |        |    |   |         |          |          |    |   |         |          |          |    |   |          |        |          |             |          |   |
| 9      | H                  | 0.739077                                                                          | 1.331006                                                                                                                                                                                                                                                                                                                                                                                                                                                                                                                                                                                                                                                                                                                                                                                                                                                                                                                                                                                                                                                                                                                                                                                                                                                                                                                                                                                                                                                                                                                                                                                                                                                                                                                                                                                                                                                                                                                                                                                                                                                                                                                                                     | -0.31993                    |        |                   |   |   |   |   |          |          |          |   |   |         |          |          |   |   |          |          |          |   |   |          |          |         |   |   |          |         |          |   |   |          |         |          |   |   |         |          |          |   |   |          |          |          |   |   |          |          |          |    |   |          |         |          |    |   |          |          |          |    |   |          |          |         |    |   |          |          |          |    |   |          |          |          |    |   |          |          |          |    |   |         |          |          |    |   |         |          |          |    |   |          |          |          |    |   |          |          |          |    |   |        |          |          |    |   |          |          |        |    |   |         |          |          |    |   |         |          |          |    |   |          |        |          |             |          |   |
| 10     | O                  | -3.22034                                                                          | -0.8299                                                                                                                                                                                                                                                                                                                                                                                                                                                                                                                                                                                                                                                                                                                                                                                                                                                                                                                                                                                                                                                                                                                                                                                                                                                                                                                                                                                                                                                                                                                                                                                                                                                                                                                                                                                                                                                                                                                                                                                                                                                                                                                                                      | 0.273338                    |        |                   |   |   |   |   |          |          |          |   |   |         |          |          |   |   |          |          |          |   |   |          |          |         |   |   |          |         |          |   |   |          |         |          |   |   |         |          |          |   |   |          |          |          |   |   |          |          |          |    |   |          |         |          |    |   |          |          |          |    |   |          |          |         |    |   |          |          |          |    |   |          |          |          |    |   |          |          |          |    |   |         |          |          |    |   |         |          |          |    |   |          |          |          |    |   |          |          |          |    |   |        |          |          |    |   |          |          |        |    |   |         |          |          |    |   |         |          |          |    |   |          |        |          |             |          |   |
| 11     | H                  | -3.52022                                                                          | 0.088975                                                                                                                                                                                                                                                                                                                                                                                                                                                                                                                                                                                                                                                                                                                                                                                                                                                                                                                                                                                                                                                                                                                                                                                                                                                                                                                                                                                                                                                                                                                                                                                                                                                                                                                                                                                                                                                                                                                                                                                                                                                                                                                                                     | 0.264996                    |        |                   |   |   |   |   |          |          |          |   |   |         |          |          |   |   |          |          |          |   |   |          |          |         |   |   |          |         |          |   |   |          |         |          |   |   |         |          |          |   |   |          |          |          |   |   |          |          |          |    |   |          |         |          |    |   |          |          |          |    |   |          |          |         |    |   |          |          |          |    |   |          |          |          |    |   |          |          |          |    |   |         |          |          |    |   |         |          |          |    |   |          |          |          |    |   |          |          |          |    |   |        |          |          |    |   |          |          |        |    |   |         |          |          |    |   |         |          |          |    |   |          |        |          |             |          |   |
| 12     | O                  | -1.98317                                                                          | 1.498768                                                                                                                                                                                                                                                                                                                                                                                                                                                                                                                                                                                                                                                                                                                                                                                                                                                                                                                                                                                                                                                                                                                                                                                                                                                                                                                                                                                                                                                                                                                                                                                                                                                                                                                                                                                                                                                                                                                                                                                                                                                                                                                                                     | 0.00469                     |        |                   |   |   |   |   |          |          |          |   |   |         |          |          |   |   |          |          |          |   |   |          |          |         |   |   |          |         |          |   |   |          |         |          |   |   |         |          |          |   |   |          |          |          |   |   |          |          |          |    |   |          |         |          |    |   |          |          |          |    |   |          |          |         |    |   |          |          |          |    |   |          |          |          |    |   |          |          |          |    |   |         |          |          |    |   |         |          |          |    |   |          |          |          |    |   |          |          |          |    |   |        |          |          |    |   |          |          |        |    |   |         |          |          |    |   |         |          |          |    |   |          |        |          |             |          |   |
| 13     | C                  | -1.38858                                                                          | 2.783784                                                                                                                                                                                                                                                                                                                                                                                                                                                                                                                                                                                                                                                                                                                                                                                                                                                                                                                                                                                                                                                                                                                                                                                                                                                                                                                                                                                                                                                                                                                                                                                                                                                                                                                                                                                                                                                                                                                                                                                                                                                                                                                                                     | -0.13284                    |        |                   |   |   |   |   |          |          |          |   |   |         |          |          |   |   |          |          |          |   |   |          |          |         |   |   |          |         |          |   |   |          |         |          |   |   |         |          |          |   |   |          |          |          |   |   |          |          |          |    |   |          |         |          |    |   |          |          |          |    |   |          |          |         |    |   |          |          |          |    |   |          |          |          |    |   |          |          |          |    |   |         |          |          |    |   |         |          |          |    |   |          |          |          |    |   |          |          |          |    |   |        |          |          |    |   |          |          |        |    |   |         |          |          |    |   |         |          |          |    |   |          |        |          |             |          |   |
| 14     | H                  | -2.20475                                                                          | 3.501092                                                                                                                                                                                                                                                                                                                                                                                                                                                                                                                                                                                                                                                                                                                                                                                                                                                                                                                                                                                                                                                                                                                                                                                                                                                                                                                                                                                                                                                                                                                                                                                                                                                                                                                                                                                                                                                                                                                                                                                                                                                                                                                                                     | -0.06471                    |        |                   |   |   |   |   |          |          |          |   |   |         |          |          |   |   |          |          |          |   |   |          |          |         |   |   |          |         |          |   |   |          |         |          |   |   |         |          |          |   |   |          |          |          |   |   |          |          |          |    |   |          |         |          |    |   |          |          |          |    |   |          |          |         |    |   |          |          |          |    |   |          |          |          |    |   |          |          |          |    |   |         |          |          |    |   |         |          |          |    |   |          |          |          |    |   |          |          |          |    |   |        |          |          |    |   |          |          |        |    |   |         |          |          |    |   |         |          |          |    |   |          |        |          |             |          |   |
| 15     | H                  | -0.66801                                                                          | 2.972635                                                                                                                                                                                                                                                                                                                                                                                                                                                                                                                                                                                                                                                                                                                                                                                                                                                                                                                                                                                                                                                                                                                                                                                                                                                                                                                                                                                                                                                                                                                                                                                                                                                                                                                                                                                                                                                                                                                                                                                                                                                                                                                                                     | 0.669312                    |        |                   |   |   |   |   |          |          |          |   |   |         |          |          |   |   |          |          |          |   |   |          |          |         |   |   |          |         |          |   |   |          |         |          |   |   |         |          |          |   |   |          |          |          |   |   |          |          |          |    |   |          |         |          |    |   |          |          |          |    |   |          |          |         |    |   |          |          |          |    |   |          |          |          |    |   |          |          |          |    |   |         |          |          |    |   |         |          |          |    |   |          |          |          |    |   |          |          |          |    |   |        |          |          |    |   |          |          |        |    |   |         |          |          |    |   |         |          |          |    |   |          |        |          |             |          |   |
| 16     | H                  | -0.8922                                                                           | 2.886499                                                                                                                                                                                                                                                                                                                                                                                                                                                                                                                                                                                                                                                                                                                                                                                                                                                                                                                                                                                                                                                                                                                                                                                                                                                                                                                                                                                                                                                                                                                                                                                                                                                                                                                                                                                                                                                                                                                                                                                                                                                                                                                                                     | -1.10326                    |        |                   |   |   |   |   |          |          |          |   |   |         |          |          |   |   |          |          |          |   |   |          |          |         |   |   |          |         |          |   |   |          |         |          |   |   |         |          |          |   |   |          |          |          |   |   |          |          |          |    |   |          |         |          |    |   |          |          |          |    |   |          |          |         |    |   |          |          |          |    |   |          |          |          |    |   |          |          |          |    |   |         |          |          |    |   |         |          |          |    |   |          |          |          |    |   |          |          |          |    |   |        |          |          |    |   |          |          |        |    |   |         |          |          |    |   |         |          |          |    |   |          |        |          |             |          |   |
| 17     | C                  | 2.42711                                                                           | -0.79683                                                                                                                                                                                                                                                                                                                                                                                                                                                                                                                                                                                                                                                                                                                                                                                                                                                                                                                                                                                                                                                                                                                                                                                                                                                                                                                                                                                                                                                                                                                                                                                                                                                                                                                                                                                                                                                                                                                                                                                                                                                                                                                                                     | -0.46703                    |        |                   |   |   |   |   |          |          |          |   |   |         |          |          |   |   |          |          |          |   |   |          |          |         |   |   |          |         |          |   |   |          |         |          |   |   |         |          |          |   |   |          |          |          |   |   |          |          |          |    |   |          |         |          |    |   |          |          |          |    |   |          |          |         |    |   |          |          |          |    |   |          |          |          |    |   |          |          |          |    |   |         |          |          |    |   |         |          |          |    |   |          |          |          |    |   |          |          |          |    |   |        |          |          |    |   |          |          |        |    |   |         |          |          |    |   |         |          |          |    |   |          |        |          |             |          |   |
| 18     | H                  | 2.790206                                                                          | -1.82936                                                                                                                                                                                                                                                                                                                                                                                                                                                                                                                                                                                                                                                                                                                                                                                                                                                                                                                                                                                                                                                                                                                                                                                                                                                                                                                                                                                                                                                                                                                                                                                                                                                                                                                                                                                                                                                                                                                                                                                                                                                                                                                                                     | -0.40995                    |        |                   |   |   |   |   |          |          |          |   |   |         |          |          |   |   |          |          |          |   |   |          |          |         |   |   |          |         |          |   |   |          |         |          |   |   |         |          |          |   |   |          |          |          |   |   |          |          |          |    |   |          |         |          |    |   |          |          |          |    |   |          |          |         |    |   |          |          |          |    |   |          |          |          |    |   |          |          |          |    |   |         |          |          |    |   |         |          |          |    |   |          |          |          |    |   |          |          |          |    |   |        |          |          |    |   |          |          |        |    |   |         |          |          |    |   |         |          |          |    |   |          |        |          |             |          |   |
| 19     | H                  | 2.660078                                                                          | -0.44086                                                                                                                                                                                                                                                                                                                                                                                                                                                                                                                                                                                                                                                                                                                                                                                                                                                                                                                                                                                                                                                                                                                                                                                                                                                                                                                                                                                                                                                                                                                                                                                                                                                                                                                                                                                                                                                                                                                                                                                                                                                                                                                                                     | -1.47759                    |        |                   |   |   |   |   |          |          |          |   |   |         |          |          |   |   |          |          |          |   |   |          |          |         |   |   |          |         |          |   |   |          |         |          |   |   |         |          |          |   |   |          |          |          |   |   |          |          |          |    |   |          |         |          |    |   |          |          |          |    |   |          |          |         |    |   |          |          |          |    |   |          |          |          |    |   |          |          |          |    |   |         |          |          |    |   |         |          |          |    |   |          |          |          |    |   |          |          |          |    |   |        |          |          |    |   |          |          |        |    |   |         |          |          |    |   |         |          |          |    |   |          |        |          |             |          |   |
| 20     | C                  | 3.1732                                                                            | 0.042306                                                                                                                                                                                                                                                                                                                                                                                                                                                                                                                                                                                                                                                                                                                                                                                                                                                                                                                                                                                                                                                                                                                                                                                                                                                                                                                                                                                                                                                                                                                                                                                                                                                                                                                                                                                                                                                                                                                                                                                                                                                                                                                                                     | 0.537084                    |        |                   |   |   |   |   |          |          |          |   |   |         |          |          |   |   |          |          |          |   |   |          |          |         |   |   |          |         |          |   |   |          |         |          |   |   |         |          |          |   |   |          |          |          |   |   |          |          |          |    |   |          |         |          |    |   |          |          |          |    |   |          |          |         |    |   |          |          |          |    |   |          |          |          |    |   |          |          |          |    |   |         |          |          |    |   |         |          |          |    |   |          |          |          |    |   |          |          |          |    |   |        |          |          |    |   |          |          |        |    |   |         |          |          |    |   |         |          |          |    |   |          |        |          |             |          |   |
| 21     | H                  | 3.021549                                                                          | -0.22728                                                                                                                                                                                                                                                                                                                                                                                                                                                                                                                                                                                                                                                                                                                                                                                                                                                                                                                                                                                                                                                                                                                                                                                                                                                                                                                                                                                                                                                                                                                                                                                                                                                                                                                                                                                                                                                                                                                                                                                                                                                                                                                                                     | 1.5809                      |        |                   |   |   |   |   |          |          |          |   |   |         |          |          |   |   |          |          |          |   |   |          |          |         |   |   |          |         |          |   |   |          |         |          |   |   |         |          |          |   |   |          |          |          |   |   |          |          |          |    |   |          |         |          |    |   |          |          |          |    |   |          |          |         |    |   |          |          |          |    |   |          |          |          |    |   |          |          |          |    |   |         |          |          |    |   |         |          |          |    |   |          |          |          |    |   |          |          |          |    |   |        |          |          |    |   |          |          |        |    |   |         |          |          |    |   |         |          |          |    |   |          |        |          |             |          |   |
| 22     | C                  | 3.97571                                                                           | 1.061797                                                                                                                                                                                                                                                                                                                                                                                                                                                                                                                                                                                                                                                                                                                                                                                                                                                                                                                                                                                                                                                                                                                                                                                                                                                                                                                                                                                                                                                                                                                                                                                                                                                                                                                                                                                                                                                                                                                                                                                                                                                                                                                                                     | 0.237507                    |        |                   |   |   |   |   |          |          |          |   |   |         |          |          |   |   |          |          |          |   |   |          |          |         |   |   |          |         |          |   |   |          |         |          |   |   |         |          |          |   |   |          |          |          |   |   |          |          |          |    |   |          |         |          |    |   |          |          |          |    |   |          |          |         |    |   |          |          |          |    |   |          |          |          |    |   |          |          |          |    |   |         |          |          |    |   |         |          |          |    |   |          |          |          |    |   |          |          |          |    |   |        |          |          |    |   |          |          |        |    |   |         |          |          |    |   |         |          |          |    |   |          |        |          |             |          |   |
| 23     | H                  | 4.15119                                                                           | 1.364179                                                                                                                                                                                                                                                                                                                                                                                                                                                                                                                                                                                                                                                                                                                                                                                                                                                                                                                                                                                                                                                                                                                                                                                                                                                                                                                                                                                                                                                                                                                                                                                                                                                                                                                                                                                                                                                                                                                                                                                                                                                                                                                                                     | -0.79109                    |        |                   |   |   |   |   |          |          |          |   |   |         |          |          |   |   |          |          |          |   |   |          |          |         |   |   |          |         |          |   |   |          |         |          |   |   |         |          |          |   |   |          |          |          |   |   |          |          |          |    |   |          |         |          |    |   |          |          |          |    |   |          |          |         |    |   |          |          |          |    |   |          |          |          |    |   |          |          |          |    |   |         |          |          |    |   |         |          |          |    |   |          |          |          |    |   |          |          |          |    |   |        |          |          |    |   |          |          |        |    |   |         |          |          |    |   |         |          |          |    |   |          |        |          |             |          |   |
| 24     | H                  | 4.491758                                                                          | 1.6249                                                                                                                                                                                                                                                                                                                                                                                                                                                                                                                                                                                                                                                                                                                                                                                                                                                                                                                                                                                                                                                                                                                                                                                                                                                                                                                                                                                                                                                                                                                                                                                                                                                                                                                                                                                                                                                                                                                                                                                                                                                                                                                                                       | 1.007203                    |        |                   |   |   |   |   |          |          |          |   |   |         |          |          |   |   |          |          |          |   |   |          |          |         |   |   |          |         |          |   |   |          |         |          |   |   |         |          |          |   |   |          |          |          |   |   |          |          |          |    |   |          |         |          |    |   |          |          |          |    |   |          |          |         |    |   |          |          |          |    |   |          |          |          |    |   |          |          |          |    |   |         |          |          |    |   |         |          |          |    |   |          |          |          |    |   |          |          |          |    |   |        |          |          |    |   |          |          |        |    |   |         |          |          |    |   |         |          |          |    |   |          |        |          |             |          |   |

| 2.  | 1_a    | 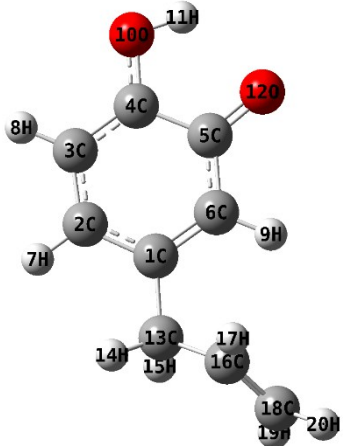 | <table border="1"> <thead> <tr> <th>Tag</th> <th>Symbol</th> <th>X</th> <th>Y</th> <th>Z</th> </tr> </thead> <tbody> <tr><td>1</td><td>C</td><td>-0.68486</td><td>0.59851</td><td>-0.04708</td></tr> <tr><td>2</td><td>C</td><td>0.229393</td><td>1.696983</td><td>-0.0115</td></tr> <tr><td>3</td><td>C</td><td>1.606353</td><td>1.523583</td><td>0.011287</td></tr> <tr><td>4</td><td>C</td><td>2.114329</td><td>0.231052</td><td>0.004996</td></tr> <tr><td>5</td><td>C</td><td>1.224657</td><td>-0.93479</td><td>-0.02557</td></tr> <tr><td>6</td><td>C</td><td>-0.19278</td><td>-0.68272</td><td>-0.05268</td></tr> <tr><td>7</td><td>H</td><td>-0.17228</td><td>2.704885</td><td>-0.00183</td></tr> <tr><td>8</td><td>H</td><td>2.281876</td><td>2.370016</td><td>0.038585</td></tr> <tr><td>9</td><td>H</td><td>-0.84925</td><td>-1.54415</td><td>-0.0809</td></tr> <tr><td>10</td><td>O</td><td>3.421116</td><td>-0.02598</td><td>0.029748</td></tr> <tr><td>11</td><td>H</td><td>3.4886</td><td>-1.00392</td><td>0.019159</td></tr> <tr><td>12</td><td>O</td><td>1.757415</td><td>-2.06844</td><td>-0.02762</td></tr> <tr><td>13</td><td>C</td><td>-2.1754</td><td>0.894216</td><td>-0.11333</td></tr> <tr><td>14</td><td>H</td><td>-2.36004</td><td>1.837413</td><td>0.416008</td></tr> <tr><td>15</td><td>H</td><td>-2.45752</td><td>1.073696</td><td>-1.15811</td></tr> <tr><td>16</td><td>C</td><td>-3.05949</td><td>-0.17372</td><td>0.468736</td></tr> <tr><td>17</td><td>H</td><td>-2.89631</td><td>-0.40188</td><td>1.520476</td></tr> <tr><td>18</td><td>C</td><td>-4.00356</td><td>-0.82999</td><td>-0.20091</td></tr> <tr><td>19</td><td>H</td><td>-4.19369</td><td>-0.63901</td><td>-1.253</td></tr> <tr><td>20</td><td>H</td><td>-4.62148</td><td>-1.58053</td><td>0.278794</td></tr> </tbody> </table> | Tag      | Symbol | X | Y | Z | 1 | C | -0.68486 | 0.59851 | -0.04708 | 2 | C | 0.229393 | 1.696983 | -0.0115 | 3 | C | 1.606353 | 1.523583 | 0.011287 | 4 | C | 2.114329 | 0.231052 | 0.004996 | 5 | C | 1.224657 | -0.93479 | -0.02557 | 6 | C | -0.19278 | -0.68272 | -0.05268 | 7 | H | -0.17228 | 2.704885 | -0.00183 | 8 | H | 2.281876 | 2.370016 | 0.038585 | 9 | H | -0.84925 | -1.54415 | -0.0809 | 10 | O | 3.421116 | -0.02598 | 0.029748 | 11 | H | 3.4886 | -1.00392 | 0.019159 | 12 | O | 1.757415 | -2.06844 | -0.02762 | 13 | C | -2.1754 | 0.894216 | -0.11333 | 14 | H | -2.36004 | 1.837413 | 0.416008 | 15 | H | -2.45752 | 1.073696 | -1.15811 | 16 | C | -3.05949 | -0.17372 | 0.468736 | 17 | H | -2.89631 | -0.40188 | 1.520476 | 18 | C | -4.00356 | -0.82999 | -0.20091 | 19 | H | -4.19369 | -0.63901 | -1.253 | 20 | H | -4.62148 | -1.58053 | 0.278794 | -498.759117 | 0.157271 | 2 |
|-----|--------|-----------------------------------------------------------------------------------|-------------------------------------------------------------------------------------------------------------------------------------------------------------------------------------------------------------------------------------------------------------------------------------------------------------------------------------------------------------------------------------------------------------------------------------------------------------------------------------------------------------------------------------------------------------------------------------------------------------------------------------------------------------------------------------------------------------------------------------------------------------------------------------------------------------------------------------------------------------------------------------------------------------------------------------------------------------------------------------------------------------------------------------------------------------------------------------------------------------------------------------------------------------------------------------------------------------------------------------------------------------------------------------------------------------------------------------------------------------------------------------------------------------------------------------------------------------------------------------------------------------------------------------------------------------------------------------------------------------------------------------------------------------------------------------------------------------------------------------------------------------------------------------------------------------------------------|----------|--------|---|---|---|---|---|----------|---------|----------|---|---|----------|----------|---------|---|---|----------|----------|----------|---|---|----------|----------|----------|---|---|----------|----------|----------|---|---|----------|----------|----------|---|---|----------|----------|----------|---|---|----------|----------|----------|---|---|----------|----------|---------|----|---|----------|----------|----------|----|---|--------|----------|----------|----|---|----------|----------|----------|----|---|---------|----------|----------|----|---|----------|----------|----------|----|---|----------|----------|----------|----|---|----------|----------|----------|----|---|----------|----------|----------|----|---|----------|----------|----------|----|---|----------|----------|--------|----|---|----------|----------|----------|-------------|----------|---|
| Tag | Symbol | X                                                                                 | Y                                                                                                                                                                                                                                                                                                                                                                                                                                                                                                                                                                                                                                                                                                                                                                                                                                                                                                                                                                                                                                                                                                                                                                                                                                                                                                                                                                                                                                                                                                                                                                                                                                                                                                                                                                                                                             | Z        |        |   |   |   |   |   |          |         |          |   |   |          |          |         |   |   |          |          |          |   |   |          |          |          |   |   |          |          |          |   |   |          |          |          |   |   |          |          |          |   |   |          |          |          |   |   |          |          |         |    |   |          |          |          |    |   |        |          |          |    |   |          |          |          |    |   |         |          |          |    |   |          |          |          |    |   |          |          |          |    |   |          |          |          |    |   |          |          |          |    |   |          |          |          |    |   |          |          |        |    |   |          |          |          |             |          |   |
| 1   | C      | -0.68486                                                                          | 0.59851                                                                                                                                                                                                                                                                                                                                                                                                                                                                                                                                                                                                                                                                                                                                                                                                                                                                                                                                                                                                                                                                                                                                                                                                                                                                                                                                                                                                                                                                                                                                                                                                                                                                                                                                                                                                                       | -0.04708 |        |   |   |   |   |   |          |         |          |   |   |          |          |         |   |   |          |          |          |   |   |          |          |          |   |   |          |          |          |   |   |          |          |          |   |   |          |          |          |   |   |          |          |          |   |   |          |          |         |    |   |          |          |          |    |   |        |          |          |    |   |          |          |          |    |   |         |          |          |    |   |          |          |          |    |   |          |          |          |    |   |          |          |          |    |   |          |          |          |    |   |          |          |          |    |   |          |          |        |    |   |          |          |          |             |          |   |
| 2   | C      | 0.229393                                                                          | 1.696983                                                                                                                                                                                                                                                                                                                                                                                                                                                                                                                                                                                                                                                                                                                                                                                                                                                                                                                                                                                                                                                                                                                                                                                                                                                                                                                                                                                                                                                                                                                                                                                                                                                                                                                                                                                                                      | -0.0115  |        |   |   |   |   |   |          |         |          |   |   |          |          |         |   |   |          |          |          |   |   |          |          |          |   |   |          |          |          |   |   |          |          |          |   |   |          |          |          |   |   |          |          |          |   |   |          |          |         |    |   |          |          |          |    |   |        |          |          |    |   |          |          |          |    |   |         |          |          |    |   |          |          |          |    |   |          |          |          |    |   |          |          |          |    |   |          |          |          |    |   |          |          |          |    |   |          |          |        |    |   |          |          |          |             |          |   |
| 3   | C      | 1.606353                                                                          | 1.523583                                                                                                                                                                                                                                                                                                                                                                                                                                                                                                                                                                                                                                                                                                                                                                                                                                                                                                                                                                                                                                                                                                                                                                                                                                                                                                                                                                                                                                                                                                                                                                                                                                                                                                                                                                                                                      | 0.011287 |        |   |   |   |   |   |          |         |          |   |   |          |          |         |   |   |          |          |          |   |   |          |          |          |   |   |          |          |          |   |   |          |          |          |   |   |          |          |          |   |   |          |          |          |   |   |          |          |         |    |   |          |          |          |    |   |        |          |          |    |   |          |          |          |    |   |         |          |          |    |   |          |          |          |    |   |          |          |          |    |   |          |          |          |    |   |          |          |          |    |   |          |          |          |    |   |          |          |        |    |   |          |          |          |             |          |   |
| 4   | C      | 2.114329                                                                          | 0.231052                                                                                                                                                                                                                                                                                                                                                                                                                                                                                                                                                                                                                                                                                                                                                                                                                                                                                                                                                                                                                                                                                                                                                                                                                                                                                                                                                                                                                                                                                                                                                                                                                                                                                                                                                                                                                      | 0.004996 |        |   |   |   |   |   |          |         |          |   |   |          |          |         |   |   |          |          |          |   |   |          |          |          |   |   |          |          |          |   |   |          |          |          |   |   |          |          |          |   |   |          |          |          |   |   |          |          |         |    |   |          |          |          |    |   |        |          |          |    |   |          |          |          |    |   |         |          |          |    |   |          |          |          |    |   |          |          |          |    |   |          |          |          |    |   |          |          |          |    |   |          |          |          |    |   |          |          |        |    |   |          |          |          |             |          |   |
| 5   | C      | 1.224657                                                                          | -0.93479                                                                                                                                                                                                                                                                                                                                                                                                                                                                                                                                                                                                                                                                                                                                                                                                                                                                                                                                                                                                                                                                                                                                                                                                                                                                                                                                                                                                                                                                                                                                                                                                                                                                                                                                                                                                                      | -0.02557 |        |   |   |   |   |   |          |         |          |   |   |          |          |         |   |   |          |          |          |   |   |          |          |          |   |   |          |          |          |   |   |          |          |          |   |   |          |          |          |   |   |          |          |          |   |   |          |          |         |    |   |          |          |          |    |   |        |          |          |    |   |          |          |          |    |   |         |          |          |    |   |          |          |          |    |   |          |          |          |    |   |          |          |          |    |   |          |          |          |    |   |          |          |          |    |   |          |          |        |    |   |          |          |          |             |          |   |
| 6   | C      | -0.19278                                                                          | -0.68272                                                                                                                                                                                                                                                                                                                                                                                                                                                                                                                                                                                                                                                                                                                                                                                                                                                                                                                                                                                                                                                                                                                                                                                                                                                                                                                                                                                                                                                                                                                                                                                                                                                                                                                                                                                                                      | -0.05268 |        |   |   |   |   |   |          |         |          |   |   |          |          |         |   |   |          |          |          |   |   |          |          |          |   |   |          |          |          |   |   |          |          |          |   |   |          |          |          |   |   |          |          |          |   |   |          |          |         |    |   |          |          |          |    |   |        |          |          |    |   |          |          |          |    |   |         |          |          |    |   |          |          |          |    |   |          |          |          |    |   |          |          |          |    |   |          |          |          |    |   |          |          |          |    |   |          |          |        |    |   |          |          |          |             |          |   |
| 7   | H      | -0.17228                                                                          | 2.704885                                                                                                                                                                                                                                                                                                                                                                                                                                                                                                                                                                                                                                                                                                                                                                                                                                                                                                                                                                                                                                                                                                                                                                                                                                                                                                                                                                                                                                                                                                                                                                                                                                                                                                                                                                                                                      | -0.00183 |        |   |   |   |   |   |          |         |          |   |   |          |          |         |   |   |          |          |          |   |   |          |          |          |   |   |          |          |          |   |   |          |          |          |   |   |          |          |          |   |   |          |          |          |   |   |          |          |         |    |   |          |          |          |    |   |        |          |          |    |   |          |          |          |    |   |         |          |          |    |   |          |          |          |    |   |          |          |          |    |   |          |          |          |    |   |          |          |          |    |   |          |          |          |    |   |          |          |        |    |   |          |          |          |             |          |   |
| 8   | H      | 2.281876                                                                          | 2.370016                                                                                                                                                                                                                                                                                                                                                                                                                                                                                                                                                                                                                                                                                                                                                                                                                                                                                                                                                                                                                                                                                                                                                                                                                                                                                                                                                                                                                                                                                                                                                                                                                                                                                                                                                                                                                      | 0.038585 |        |   |   |   |   |   |          |         |          |   |   |          |          |         |   |   |          |          |          |   |   |          |          |          |   |   |          |          |          |   |   |          |          |          |   |   |          |          |          |   |   |          |          |          |   |   |          |          |         |    |   |          |          |          |    |   |        |          |          |    |   |          |          |          |    |   |         |          |          |    |   |          |          |          |    |   |          |          |          |    |   |          |          |          |    |   |          |          |          |    |   |          |          |          |    |   |          |          |        |    |   |          |          |          |             |          |   |
| 9   | H      | -0.84925                                                                          | -1.54415                                                                                                                                                                                                                                                                                                                                                                                                                                                                                                                                                                                                                                                                                                                                                                                                                                                                                                                                                                                                                                                                                                                                                                                                                                                                                                                                                                                                                                                                                                                                                                                                                                                                                                                                                                                                                      | -0.0809  |        |   |   |   |   |   |          |         |          |   |   |          |          |         |   |   |          |          |          |   |   |          |          |          |   |   |          |          |          |   |   |          |          |          |   |   |          |          |          |   |   |          |          |          |   |   |          |          |         |    |   |          |          |          |    |   |        |          |          |    |   |          |          |          |    |   |         |          |          |    |   |          |          |          |    |   |          |          |          |    |   |          |          |          |    |   |          |          |          |    |   |          |          |          |    |   |          |          |        |    |   |          |          |          |             |          |   |
| 10  | O      | 3.421116                                                                          | -0.02598                                                                                                                                                                                                                                                                                                                                                                                                                                                                                                                                                                                                                                                                                                                                                                                                                                                                                                                                                                                                                                                                                                                                                                                                                                                                                                                                                                                                                                                                                                                                                                                                                                                                                                                                                                                                                      | 0.029748 |        |   |   |   |   |   |          |         |          |   |   |          |          |         |   |   |          |          |          |   |   |          |          |          |   |   |          |          |          |   |   |          |          |          |   |   |          |          |          |   |   |          |          |          |   |   |          |          |         |    |   |          |          |          |    |   |        |          |          |    |   |          |          |          |    |   |         |          |          |    |   |          |          |          |    |   |          |          |          |    |   |          |          |          |    |   |          |          |          |    |   |          |          |          |    |   |          |          |        |    |   |          |          |          |             |          |   |
| 11  | H      | 3.4886                                                                            | -1.00392                                                                                                                                                                                                                                                                                                                                                                                                                                                                                                                                                                                                                                                                                                                                                                                                                                                                                                                                                                                                                                                                                                                                                                                                                                                                                                                                                                                                                                                                                                                                                                                                                                                                                                                                                                                                                      | 0.019159 |        |   |   |   |   |   |          |         |          |   |   |          |          |         |   |   |          |          |          |   |   |          |          |          |   |   |          |          |          |   |   |          |          |          |   |   |          |          |          |   |   |          |          |          |   |   |          |          |         |    |   |          |          |          |    |   |        |          |          |    |   |          |          |          |    |   |         |          |          |    |   |          |          |          |    |   |          |          |          |    |   |          |          |          |    |   |          |          |          |    |   |          |          |          |    |   |          |          |        |    |   |          |          |          |             |          |   |
| 12  | O      | 1.757415                                                                          | -2.06844                                                                                                                                                                                                                                                                                                                                                                                                                                                                                                                                                                                                                                                                                                                                                                                                                                                                                                                                                                                                                                                                                                                                                                                                                                                                                                                                                                                                                                                                                                                                                                                                                                                                                                                                                                                                                      | -0.02762 |        |   |   |   |   |   |          |         |          |   |   |          |          |         |   |   |          |          |          |   |   |          |          |          |   |   |          |          |          |   |   |          |          |          |   |   |          |          |          |   |   |          |          |          |   |   |          |          |         |    |   |          |          |          |    |   |        |          |          |    |   |          |          |          |    |   |         |          |          |    |   |          |          |          |    |   |          |          |          |    |   |          |          |          |    |   |          |          |          |    |   |          |          |          |    |   |          |          |        |    |   |          |          |          |             |          |   |
| 13  | C      | -2.1754                                                                           | 0.894216                                                                                                                                                                                                                                                                                                                                                                                                                                                                                                                                                                                                                                                                                                                                                                                                                                                                                                                                                                                                                                                                                                                                                                                                                                                                                                                                                                                                                                                                                                                                                                                                                                                                                                                                                                                                                      | -0.11333 |        |   |   |   |   |   |          |         |          |   |   |          |          |         |   |   |          |          |          |   |   |          |          |          |   |   |          |          |          |   |   |          |          |          |   |   |          |          |          |   |   |          |          |          |   |   |          |          |         |    |   |          |          |          |    |   |        |          |          |    |   |          |          |          |    |   |         |          |          |    |   |          |          |          |    |   |          |          |          |    |   |          |          |          |    |   |          |          |          |    |   |          |          |          |    |   |          |          |        |    |   |          |          |          |             |          |   |
| 14  | H      | -2.36004                                                                          | 1.837413                                                                                                                                                                                                                                                                                                                                                                                                                                                                                                                                                                                                                                                                                                                                                                                                                                                                                                                                                                                                                                                                                                                                                                                                                                                                                                                                                                                                                                                                                                                                                                                                                                                                                                                                                                                                                      | 0.416008 |        |   |   |   |   |   |          |         |          |   |   |          |          |         |   |   |          |          |          |   |   |          |          |          |   |   |          |          |          |   |   |          |          |          |   |   |          |          |          |   |   |          |          |          |   |   |          |          |         |    |   |          |          |          |    |   |        |          |          |    |   |          |          |          |    |   |         |          |          |    |   |          |          |          |    |   |          |          |          |    |   |          |          |          |    |   |          |          |          |    |   |          |          |          |    |   |          |          |        |    |   |          |          |          |             |          |   |
| 15  | H      | -2.45752                                                                          | 1.073696                                                                                                                                                                                                                                                                                                                                                                                                                                                                                                                                                                                                                                                                                                                                                                                                                                                                                                                                                                                                                                                                                                                                                                                                                                                                                                                                                                                                                                                                                                                                                                                                                                                                                                                                                                                                                      | -1.15811 |        |   |   |   |   |   |          |         |          |   |   |          |          |         |   |   |          |          |          |   |   |          |          |          |   |   |          |          |          |   |   |          |          |          |   |   |          |          |          |   |   |          |          |          |   |   |          |          |         |    |   |          |          |          |    |   |        |          |          |    |   |          |          |          |    |   |         |          |          |    |   |          |          |          |    |   |          |          |          |    |   |          |          |          |    |   |          |          |          |    |   |          |          |          |    |   |          |          |        |    |   |          |          |          |             |          |   |
| 16  | C      | -3.05949                                                                          | -0.17372                                                                                                                                                                                                                                                                                                                                                                                                                                                                                                                                                                                                                                                                                                                                                                                                                                                                                                                                                                                                                                                                                                                                                                                                                                                                                                                                                                                                                                                                                                                                                                                                                                                                                                                                                                                                                      | 0.468736 |        |   |   |   |   |   |          |         |          |   |   |          |          |         |   |   |          |          |          |   |   |          |          |          |   |   |          |          |          |   |   |          |          |          |   |   |          |          |          |   |   |          |          |          |   |   |          |          |         |    |   |          |          |          |    |   |        |          |          |    |   |          |          |          |    |   |         |          |          |    |   |          |          |          |    |   |          |          |          |    |   |          |          |          |    |   |          |          |          |    |   |          |          |          |    |   |          |          |        |    |   |          |          |          |             |          |   |
| 17  | H      | -2.89631                                                                          | -0.40188                                                                                                                                                                                                                                                                                                                                                                                                                                                                                                                                                                                                                                                                                                                                                                                                                                                                                                                                                                                                                                                                                                                                                                                                                                                                                                                                                                                                                                                                                                                                                                                                                                                                                                                                                                                                                      | 1.520476 |        |   |   |   |   |   |          |         |          |   |   |          |          |         |   |   |          |          |          |   |   |          |          |          |   |   |          |          |          |   |   |          |          |          |   |   |          |          |          |   |   |          |          |          |   |   |          |          |         |    |   |          |          |          |    |   |        |          |          |    |   |          |          |          |    |   |         |          |          |    |   |          |          |          |    |   |          |          |          |    |   |          |          |          |    |   |          |          |          |    |   |          |          |          |    |   |          |          |        |    |   |          |          |          |             |          |   |
| 18  | C      | -4.00356                                                                          | -0.82999                                                                                                                                                                                                                                                                                                                                                                                                                                                                                                                                                                                                                                                                                                                                                                                                                                                                                                                                                                                                                                                                                                                                                                                                                                                                                                                                                                                                                                                                                                                                                                                                                                                                                                                                                                                                                      | -0.20091 |        |   |   |   |   |   |          |         |          |   |   |          |          |         |   |   |          |          |          |   |   |          |          |          |   |   |          |          |          |   |   |          |          |          |   |   |          |          |          |   |   |          |          |          |   |   |          |          |         |    |   |          |          |          |    |   |        |          |          |    |   |          |          |          |    |   |         |          |          |    |   |          |          |          |    |   |          |          |          |    |   |          |          |          |    |   |          |          |          |    |   |          |          |          |    |   |          |          |        |    |   |          |          |          |             |          |   |
| 19  | H      | -4.19369                                                                          | -0.63901                                                                                                                                                                                                                                                                                                                                                                                                                                                                                                                                                                                                                                                                                                                                                                                                                                                                                                                                                                                                                                                                                                                                                                                                                                                                                                                                                                                                                                                                                                                                                                                                                                                                                                                                                                                                                      | -1.253   |        |   |   |   |   |   |          |         |          |   |   |          |          |         |   |   |          |          |          |   |   |          |          |          |   |   |          |          |          |   |   |          |          |          |   |   |          |          |          |   |   |          |          |          |   |   |          |          |         |    |   |          |          |          |    |   |        |          |          |    |   |          |          |          |    |   |         |          |          |    |   |          |          |          |    |   |          |          |          |    |   |          |          |          |    |   |          |          |          |    |   |          |          |          |    |   |          |          |        |    |   |          |          |          |             |          |   |
| 20  | H      | -4.62148                                                                          | -1.58053                                                                                                                                                                                                                                                                                                                                                                                                                                                                                                                                                                                                                                                                                                                                                                                                                                                                                                                                                                                                                                                                                                                                                                                                                                                                                                                                                                                                                                                                                                                                                                                                                                                                                                                                                                                                                      | 0.278794 |        |   |   |   |   |   |          |         |          |   |   |          |          |         |   |   |          |          |          |   |   |          |          |          |   |   |          |          |          |   |   |          |          |          |   |   |          |          |          |   |   |          |          |          |   |   |          |          |         |    |   |          |          |          |    |   |        |          |          |    |   |          |          |          |    |   |         |          |          |    |   |          |          |          |    |   |          |          |          |    |   |          |          |          |    |   |          |          |          |    |   |          |          |          |    |   |          |          |        |    |   |          |          |          |             |          |   |

| 3.  | <b>1_b</b>  | 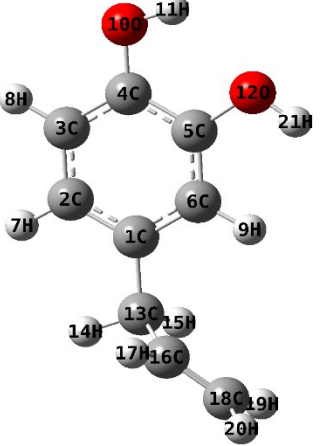  | <table border="1"> <thead> <tr> <th>Tag</th> <th>Symbol</th> <th>X</th> <th>Y</th> <th>Z</th> </tr> </thead> <tbody> <tr><td>1</td><td>C</td><td>0.724638</td><td>-0.62009</td><td>-0.23155</td></tr> <tr><td>2</td><td>C</td><td>-0.1155</td><td>-1.71922</td><td>-0.05049</td></tr> <tr><td>3</td><td>C</td><td>-1.49314</td><td>-1.55844</td><td>0.105991</td></tr> <tr><td>4</td><td>C</td><td>-2.0546</td><td>-0.28928</td><td>0.086008</td></tr> <tr><td>5</td><td>C</td><td>-1.21788</td><td>0.821235</td><td>-0.09265</td></tr> <tr><td>6</td><td>C</td><td>0.150657</td><td>0.658302</td><td>-0.24822</td></tr> <tr><td>7</td><td>H</td><td>0.305142</td><td>-2.71872</td><td>-0.03236</td></tr> <tr><td>8</td><td>H</td><td>-2.14505</td><td>-2.41223</td><td>0.247487</td></tr> <tr><td>9</td><td>H</td><td>0.782834</td><td>1.532955</td><td>-0.37637</td></tr> <tr><td>10</td><td>O</td><td>-3.40116</td><td>-0.1317</td><td>0.241846</td></tr> <tr><td>11</td><td>H</td><td>-3.60319</td><td>0.812094</td><td>0.205421</td></tr> <tr><td>12</td><td>O</td><td>-1.85921</td><td>2.04201</td><td>-0.09767</td></tr> <tr><td>13</td><td>C</td><td>2.222518</td><td>-0.79174</td><td>-0.42573</td></tr> <tr><td>14</td><td>H</td><td>2.465364</td><td>-1.8528</td><td>-0.29766</td></tr> <tr><td>15</td><td>H</td><td>2.500143</td><td>-0.53211</td><td>-1.45408</td></tr> <tr><td>16</td><td>C</td><td>3.053458</td><td>0.021643</td><td>0.531852</td></tr> <tr><td>17</td><td>H</td><td>2.868631</td><td>-0.16195</td><td>1.588842</td></tr> <tr><td>18</td><td>C</td><td>3.965621</td><td>0.924398</td><td>0.176832</td></tr> <tr><td>19</td><td>H</td><td>4.177323</td><td>1.138867</td><td>-0.86687</td></tr> <tr><td>20</td><td>H</td><td>4.538828</td><td>1.47437</td><td>0.914856</td></tr> </tbody> </table> | Tag      | Symbol | X | Y | Z | 1 | C | 0.724638 | -0.62009 | -0.23155 | 2 | C | -0.1155  | -1.71922 | -0.05049 | 3 | C | -1.49314 | -1.55844 | 0.105991 | 4 | C | -2.0546  | -0.28928 | 0.086008 | 5 | C | -1.21788 | 0.821235 | -0.09265 | 6 | C | 0.150657 | 0.658302 | -0.24822 | 7 | H | 0.305142 | -2.71872 | -0.03236 | 8 | H | -2.14505 | -2.41223 | 0.247487 | 9 | H | 0.782834 | 1.532955 | -0.37637 | 10 | O | -3.40116 | -0.1317  | 0.241846 | 11 | H | -3.60319 | 0.812094 | 0.205421 | 12          | O        | -1.85921 | 2.04201 | -0.09767 | 13 | C | 2.222518 | -0.79174 | -0.42573 | 14 | H | 2.465364 | -1.8528 | -0.29766 | 15 | H | 2.500143 | -0.53211 | -1.45408 | 16 | C | 3.053458 | 0.021643 | 0.531852 | 17 | H | 2.868631 | -0.16195 | 1.588842 | 18 | C | 3.965621 | 0.924398 | 0.176832 | 19 | H | 4.177323 | 1.138867 | -0.86687 | 20 | H | 4.538828 | 1.47437 | 0.914856 | -499.377655 | 0.169060 | 1 |
|-----|-------------|------------------------------------------------------------------------------------|---------------------------------------------------------------------------------------------------------------------------------------------------------------------------------------------------------------------------------------------------------------------------------------------------------------------------------------------------------------------------------------------------------------------------------------------------------------------------------------------------------------------------------------------------------------------------------------------------------------------------------------------------------------------------------------------------------------------------------------------------------------------------------------------------------------------------------------------------------------------------------------------------------------------------------------------------------------------------------------------------------------------------------------------------------------------------------------------------------------------------------------------------------------------------------------------------------------------------------------------------------------------------------------------------------------------------------------------------------------------------------------------------------------------------------------------------------------------------------------------------------------------------------------------------------------------------------------------------------------------------------------------------------------------------------------------------------------------------------------------------------------------------------------------------------------------------------|----------|--------|---|---|---|---|---|----------|----------|----------|---|---|----------|----------|----------|---|---|----------|----------|----------|---|---|----------|----------|----------|---|---|----------|----------|----------|---|---|----------|----------|----------|---|---|----------|----------|----------|---|---|----------|----------|----------|---|---|----------|----------|----------|----|---|----------|----------|----------|----|---|----------|----------|----------|-------------|----------|----------|---------|----------|----|---|----------|----------|----------|----|---|----------|---------|----------|----|---|----------|----------|----------|----|---|----------|----------|----------|----|---|----------|----------|----------|----|---|----------|----------|----------|----|---|----------|----------|----------|----|---|----------|---------|----------|-------------|----------|---|
| Tag | Symbol      | X                                                                                  | Y                                                                                                                                                                                                                                                                                                                                                                                                                                                                                                                                                                                                                                                                                                                                                                                                                                                                                                                                                                                                                                                                                                                                                                                                                                                                                                                                                                                                                                                                                                                                                                                                                                                                                                                                                                                                                               | Z        |        |   |   |   |   |   |          |          |          |   |   |          |          |          |   |   |          |          |          |   |   |          |          |          |   |   |          |          |          |   |   |          |          |          |   |   |          |          |          |   |   |          |          |          |   |   |          |          |          |    |   |          |          |          |    |   |          |          |          |             |          |          |         |          |    |   |          |          |          |    |   |          |         |          |    |   |          |          |          |    |   |          |          |          |    |   |          |          |          |    |   |          |          |          |    |   |          |          |          |    |   |          |         |          |             |          |   |
| 1   | C           | 0.724638                                                                           | -0.62009                                                                                                                                                                                                                                                                                                                                                                                                                                                                                                                                                                                                                                                                                                                                                                                                                                                                                                                                                                                                                                                                                                                                                                                                                                                                                                                                                                                                                                                                                                                                                                                                                                                                                                                                                                                                                        | -0.23155 |        |   |   |   |   |   |          |          |          |   |   |          |          |          |   |   |          |          |          |   |   |          |          |          |   |   |          |          |          |   |   |          |          |          |   |   |          |          |          |   |   |          |          |          |   |   |          |          |          |    |   |          |          |          |    |   |          |          |          |             |          |          |         |          |    |   |          |          |          |    |   |          |         |          |    |   |          |          |          |    |   |          |          |          |    |   |          |          |          |    |   |          |          |          |    |   |          |          |          |    |   |          |         |          |             |          |   |
| 2   | C           | -0.1155                                                                            | -1.71922                                                                                                                                                                                                                                                                                                                                                                                                                                                                                                                                                                                                                                                                                                                                                                                                                                                                                                                                                                                                                                                                                                                                                                                                                                                                                                                                                                                                                                                                                                                                                                                                                                                                                                                                                                                                                        | -0.05049 |        |   |   |   |   |   |          |          |          |   |   |          |          |          |   |   |          |          |          |   |   |          |          |          |   |   |          |          |          |   |   |          |          |          |   |   |          |          |          |   |   |          |          |          |   |   |          |          |          |    |   |          |          |          |    |   |          |          |          |             |          |          |         |          |    |   |          |          |          |    |   |          |         |          |    |   |          |          |          |    |   |          |          |          |    |   |          |          |          |    |   |          |          |          |    |   |          |          |          |    |   |          |         |          |             |          |   |
| 3   | C           | -1.49314                                                                           | -1.55844                                                                                                                                                                                                                                                                                                                                                                                                                                                                                                                                                                                                                                                                                                                                                                                                                                                                                                                                                                                                                                                                                                                                                                                                                                                                                                                                                                                                                                                                                                                                                                                                                                                                                                                                                                                                                        | 0.105991 |        |   |   |   |   |   |          |          |          |   |   |          |          |          |   |   |          |          |          |   |   |          |          |          |   |   |          |          |          |   |   |          |          |          |   |   |          |          |          |   |   |          |          |          |   |   |          |          |          |    |   |          |          |          |    |   |          |          |          |             |          |          |         |          |    |   |          |          |          |    |   |          |         |          |    |   |          |          |          |    |   |          |          |          |    |   |          |          |          |    |   |          |          |          |    |   |          |          |          |    |   |          |         |          |             |          |   |
| 4   | C           | -2.0546                                                                            | -0.28928                                                                                                                                                                                                                                                                                                                                                                                                                                                                                                                                                                                                                                                                                                                                                                                                                                                                                                                                                                                                                                                                                                                                                                                                                                                                                                                                                                                                                                                                                                                                                                                                                                                                                                                                                                                                                        | 0.086008 |        |   |   |   |   |   |          |          |          |   |   |          |          |          |   |   |          |          |          |   |   |          |          |          |   |   |          |          |          |   |   |          |          |          |   |   |          |          |          |   |   |          |          |          |   |   |          |          |          |    |   |          |          |          |    |   |          |          |          |             |          |          |         |          |    |   |          |          |          |    |   |          |         |          |    |   |          |          |          |    |   |          |          |          |    |   |          |          |          |    |   |          |          |          |    |   |          |          |          |    |   |          |         |          |             |          |   |
| 5   | C           | -1.21788                                                                           | 0.821235                                                                                                                                                                                                                                                                                                                                                                                                                                                                                                                                                                                                                                                                                                                                                                                                                                                                                                                                                                                                                                                                                                                                                                                                                                                                                                                                                                                                                                                                                                                                                                                                                                                                                                                                                                                                                        | -0.09265 |        |   |   |   |   |   |          |          |          |   |   |          |          |          |   |   |          |          |          |   |   |          |          |          |   |   |          |          |          |   |   |          |          |          |   |   |          |          |          |   |   |          |          |          |   |   |          |          |          |    |   |          |          |          |    |   |          |          |          |             |          |          |         |          |    |   |          |          |          |    |   |          |         |          |    |   |          |          |          |    |   |          |          |          |    |   |          |          |          |    |   |          |          |          |    |   |          |          |          |    |   |          |         |          |             |          |   |
| 6   | C           | 0.150657                                                                           | 0.658302                                                                                                                                                                                                                                                                                                                                                                                                                                                                                                                                                                                                                                                                                                                                                                                                                                                                                                                                                                                                                                                                                                                                                                                                                                                                                                                                                                                                                                                                                                                                                                                                                                                                                                                                                                                                                        | -0.24822 |        |   |   |   |   |   |          |          |          |   |   |          |          |          |   |   |          |          |          |   |   |          |          |          |   |   |          |          |          |   |   |          |          |          |   |   |          |          |          |   |   |          |          |          |   |   |          |          |          |    |   |          |          |          |    |   |          |          |          |             |          |          |         |          |    |   |          |          |          |    |   |          |         |          |    |   |          |          |          |    |   |          |          |          |    |   |          |          |          |    |   |          |          |          |    |   |          |          |          |    |   |          |         |          |             |          |   |
| 7   | H           | 0.305142                                                                           | -2.71872                                                                                                                                                                                                                                                                                                                                                                                                                                                                                                                                                                                                                                                                                                                                                                                                                                                                                                                                                                                                                                                                                                                                                                                                                                                                                                                                                                                                                                                                                                                                                                                                                                                                                                                                                                                                                        | -0.03236 |        |   |   |   |   |   |          |          |          |   |   |          |          |          |   |   |          |          |          |   |   |          |          |          |   |   |          |          |          |   |   |          |          |          |   |   |          |          |          |   |   |          |          |          |   |   |          |          |          |    |   |          |          |          |    |   |          |          |          |             |          |          |         |          |    |   |          |          |          |    |   |          |         |          |    |   |          |          |          |    |   |          |          |          |    |   |          |          |          |    |   |          |          |          |    |   |          |          |          |    |   |          |         |          |             |          |   |
| 8   | H           | -2.14505                                                                           | -2.41223                                                                                                                                                                                                                                                                                                                                                                                                                                                                                                                                                                                                                                                                                                                                                                                                                                                                                                                                                                                                                                                                                                                                                                                                                                                                                                                                                                                                                                                                                                                                                                                                                                                                                                                                                                                                                        | 0.247487 |        |   |   |   |   |   |          |          |          |   |   |          |          |          |   |   |          |          |          |   |   |          |          |          |   |   |          |          |          |   |   |          |          |          |   |   |          |          |          |   |   |          |          |          |   |   |          |          |          |    |   |          |          |          |    |   |          |          |          |             |          |          |         |          |    |   |          |          |          |    |   |          |         |          |    |   |          |          |          |    |   |          |          |          |    |   |          |          |          |    |   |          |          |          |    |   |          |          |          |    |   |          |         |          |             |          |   |
| 9   | H           | 0.782834                                                                           | 1.532955                                                                                                                                                                                                                                                                                                                                                                                                                                                                                                                                                                                                                                                                                                                                                                                                                                                                                                                                                                                                                                                                                                                                                                                                                                                                                                                                                                                                                                                                                                                                                                                                                                                                                                                                                                                                                        | -0.37637 |        |   |   |   |   |   |          |          |          |   |   |          |          |          |   |   |          |          |          |   |   |          |          |          |   |   |          |          |          |   |   |          |          |          |   |   |          |          |          |   |   |          |          |          |   |   |          |          |          |    |   |          |          |          |    |   |          |          |          |             |          |          |         |          |    |   |          |          |          |    |   |          |         |          |    |   |          |          |          |    |   |          |          |          |    |   |          |          |          |    |   |          |          |          |    |   |          |          |          |    |   |          |         |          |             |          |   |
| 10  | O           | -3.40116                                                                           | -0.1317                                                                                                                                                                                                                                                                                                                                                                                                                                                                                                                                                                                                                                                                                                                                                                                                                                                                                                                                                                                                                                                                                                                                                                                                                                                                                                                                                                                                                                                                                                                                                                                                                                                                                                                                                                                                                         | 0.241846 |        |   |   |   |   |   |          |          |          |   |   |          |          |          |   |   |          |          |          |   |   |          |          |          |   |   |          |          |          |   |   |          |          |          |   |   |          |          |          |   |   |          |          |          |   |   |          |          |          |    |   |          |          |          |    |   |          |          |          |             |          |          |         |          |    |   |          |          |          |    |   |          |         |          |    |   |          |          |          |    |   |          |          |          |    |   |          |          |          |    |   |          |          |          |    |   |          |          |          |    |   |          |         |          |             |          |   |
| 11  | H           | -3.60319                                                                           | 0.812094                                                                                                                                                                                                                                                                                                                                                                                                                                                                                                                                                                                                                                                                                                                                                                                                                                                                                                                                                                                                                                                                                                                                                                                                                                                                                                                                                                                                                                                                                                                                                                                                                                                                                                                                                                                                                        | 0.205421 |        |   |   |   |   |   |          |          |          |   |   |          |          |          |   |   |          |          |          |   |   |          |          |          |   |   |          |          |          |   |   |          |          |          |   |   |          |          |          |   |   |          |          |          |   |   |          |          |          |    |   |          |          |          |    |   |          |          |          |             |          |          |         |          |    |   |          |          |          |    |   |          |         |          |    |   |          |          |          |    |   |          |          |          |    |   |          |          |          |    |   |          |          |          |    |   |          |          |          |    |   |          |         |          |             |          |   |
| 12  | O           | -1.85921                                                                           | 2.04201                                                                                                                                                                                                                                                                                                                                                                                                                                                                                                                                                                                                                                                                                                                                                                                                                                                                                                                                                                                                                                                                                                                                                                                                                                                                                                                                                                                                                                                                                                                                                                                                                                                                                                                                                                                                                         | -0.09767 |        |   |   |   |   |   |          |          |          |   |   |          |          |          |   |   |          |          |          |   |   |          |          |          |   |   |          |          |          |   |   |          |          |          |   |   |          |          |          |   |   |          |          |          |   |   |          |          |          |    |   |          |          |          |    |   |          |          |          |             |          |          |         |          |    |   |          |          |          |    |   |          |         |          |    |   |          |          |          |    |   |          |          |          |    |   |          |          |          |    |   |          |          |          |    |   |          |          |          |    |   |          |         |          |             |          |   |
| 13  | C           | 2.222518                                                                           | -0.79174                                                                                                                                                                                                                                                                                                                                                                                                                                                                                                                                                                                                                                                                                                                                                                                                                                                                                                                                                                                                                                                                                                                                                                                                                                                                                                                                                                                                                                                                                                                                                                                                                                                                                                                                                                                                                        | -0.42573 |        |   |   |   |   |   |          |          |          |   |   |          |          |          |   |   |          |          |          |   |   |          |          |          |   |   |          |          |          |   |   |          |          |          |   |   |          |          |          |   |   |          |          |          |   |   |          |          |          |    |   |          |          |          |    |   |          |          |          |             |          |          |         |          |    |   |          |          |          |    |   |          |         |          |    |   |          |          |          |    |   |          |          |          |    |   |          |          |          |    |   |          |          |          |    |   |          |          |          |    |   |          |         |          |             |          |   |
| 14  | H           | 2.465364                                                                           | -1.8528                                                                                                                                                                                                                                                                                                                                                                                                                                                                                                                                                                                                                                                                                                                                                                                                                                                                                                                                                                                                                                                                                                                                                                                                                                                                                                                                                                                                                                                                                                                                                                                                                                                                                                                                                                                                                         | -0.29766 |        |   |   |   |   |   |          |          |          |   |   |          |          |          |   |   |          |          |          |   |   |          |          |          |   |   |          |          |          |   |   |          |          |          |   |   |          |          |          |   |   |          |          |          |   |   |          |          |          |    |   |          |          |          |    |   |          |          |          |             |          |          |         |          |    |   |          |          |          |    |   |          |         |          |    |   |          |          |          |    |   |          |          |          |    |   |          |          |          |    |   |          |          |          |    |   |          |          |          |    |   |          |         |          |             |          |   |
| 15  | H           | 2.500143                                                                           | -0.53211                                                                                                                                                                                                                                                                                                                                                                                                                                                                                                                                                                                                                                                                                                                                                                                                                                                                                                                                                                                                                                                                                                                                                                                                                                                                                                                                                                                                                                                                                                                                                                                                                                                                                                                                                                                                                        | -1.45408 |        |   |   |   |   |   |          |          |          |   |   |          |          |          |   |   |          |          |          |   |   |          |          |          |   |   |          |          |          |   |   |          |          |          |   |   |          |          |          |   |   |          |          |          |   |   |          |          |          |    |   |          |          |          |    |   |          |          |          |             |          |          |         |          |    |   |          |          |          |    |   |          |         |          |    |   |          |          |          |    |   |          |          |          |    |   |          |          |          |    |   |          |          |          |    |   |          |          |          |    |   |          |         |          |             |          |   |
| 16  | C           | 3.053458                                                                           | 0.021643                                                                                                                                                                                                                                                                                                                                                                                                                                                                                                                                                                                                                                                                                                                                                                                                                                                                                                                                                                                                                                                                                                                                                                                                                                                                                                                                                                                                                                                                                                                                                                                                                                                                                                                                                                                                                        | 0.531852 |        |   |   |   |   |   |          |          |          |   |   |          |          |          |   |   |          |          |          |   |   |          |          |          |   |   |          |          |          |   |   |          |          |          |   |   |          |          |          |   |   |          |          |          |   |   |          |          |          |    |   |          |          |          |    |   |          |          |          |             |          |          |         |          |    |   |          |          |          |    |   |          |         |          |    |   |          |          |          |    |   |          |          |          |    |   |          |          |          |    |   |          |          |          |    |   |          |          |          |    |   |          |         |          |             |          |   |
| 17  | H           | 2.868631                                                                           | -0.16195                                                                                                                                                                                                                                                                                                                                                                                                                                                                                                                                                                                                                                                                                                                                                                                                                                                                                                                                                                                                                                                                                                                                                                                                                                                                                                                                                                                                                                                                                                                                                                                                                                                                                                                                                                                                                        | 1.588842 |        |   |   |   |   |   |          |          |          |   |   |          |          |          |   |   |          |          |          |   |   |          |          |          |   |   |          |          |          |   |   |          |          |          |   |   |          |          |          |   |   |          |          |          |   |   |          |          |          |    |   |          |          |          |    |   |          |          |          |             |          |          |         |          |    |   |          |          |          |    |   |          |         |          |    |   |          |          |          |    |   |          |          |          |    |   |          |          |          |    |   |          |          |          |    |   |          |          |          |    |   |          |         |          |             |          |   |
| 18  | C           | 3.965621                                                                           | 0.924398                                                                                                                                                                                                                                                                                                                                                                                                                                                                                                                                                                                                                                                                                                                                                                                                                                                                                                                                                                                                                                                                                                                                                                                                                                                                                                                                                                                                                                                                                                                                                                                                                                                                                                                                                                                                                        | 0.176832 |        |   |   |   |   |   |          |          |          |   |   |          |          |          |   |   |          |          |          |   |   |          |          |          |   |   |          |          |          |   |   |          |          |          |   |   |          |          |          |   |   |          |          |          |   |   |          |          |          |    |   |          |          |          |    |   |          |          |          |             |          |          |         |          |    |   |          |          |          |    |   |          |         |          |    |   |          |          |          |    |   |          |          |          |    |   |          |          |          |    |   |          |          |          |    |   |          |          |          |    |   |          |         |          |             |          |   |
| 19  | H           | 4.177323                                                                           | 1.138867                                                                                                                                                                                                                                                                                                                                                                                                                                                                                                                                                                                                                                                                                                                                                                                                                                                                                                                                                                                                                                                                                                                                                                                                                                                                                                                                                                                                                                                                                                                                                                                                                                                                                                                                                                                                                        | -0.86687 |        |   |   |   |   |   |          |          |          |   |   |          |          |          |   |   |          |          |          |   |   |          |          |          |   |   |          |          |          |   |   |          |          |          |   |   |          |          |          |   |   |          |          |          |   |   |          |          |          |    |   |          |          |          |    |   |          |          |          |             |          |          |         |          |    |   |          |          |          |    |   |          |         |          |    |   |          |          |          |    |   |          |          |          |    |   |          |          |          |    |   |          |          |          |    |   |          |          |          |    |   |          |         |          |             |          |   |
| 20  | H           | 4.538828                                                                           | 1.47437                                                                                                                                                                                                                                                                                                                                                                                                                                                                                                                                                                                                                                                                                                                                                                                                                                                                                                                                                                                                                                                                                                                                                                                                                                                                                                                                                                                                                                                                                                                                                                                                                                                                                                                                                                                                                         | 0.914856 |        |   |   |   |   |   |          |          |          |   |   |          |          |          |   |   |          |          |          |   |   |          |          |          |   |   |          |          |          |   |   |          |          |          |   |   |          |          |          |   |   |          |          |          |   |   |          |          |          |    |   |          |          |          |    |   |          |          |          |             |          |          |         |          |    |   |          |          |          |    |   |          |         |          |    |   |          |          |          |    |   |          |          |          |    |   |          |          |          |    |   |          |          |          |    |   |          |          |          |    |   |          |         |          |             |          |   |
| 4.  | <b>1_b*</b> |  | <table border="1"> <thead> <tr> <th>Tag</th> <th>Symbol</th> <th>X</th> <th>Y</th> <th>Z</th> </tr> </thead> <tbody> <tr><td>1</td><td>C</td><td>0.73939</td><td>-0.63176</td><td>-0.20994</td></tr> <tr><td>2</td><td>C</td><td>-0.10165</td><td>-1.73097</td><td>-0.02759</td></tr> <tr><td>3</td><td>C</td><td>-1.48211</td><td>-1.57421</td><td>0.098362</td></tr> <tr><td>4</td><td>C</td><td>-2.04776</td><td>-0.3077</td><td>0.040048</td></tr> <tr><td>5</td><td>C</td><td>-1.21145</td><td>0.803628</td><td>-0.13994</td></tr> <tr><td>6</td><td>C</td><td>0.162621</td><td>0.643837</td><td>-0.26028</td></tr> <tr><td>7</td><td>H</td><td>0.322147</td><td>-2.72843</td><td>0.014124</td></tr> <tr><td>8</td><td>H</td><td>-2.13309</td><td>-2.42797</td><td>0.243621</td></tr> <tr><td>9</td><td>H</td><td>0.791984</td><td>1.51783</td><td>-0.40324</td></tr> <tr><td>10</td><td>O</td><td>-3.39712</td><td>-0.15171</td><td>0.157421</td></tr> <tr><td>11</td><td>H</td><td>-3.59587</td><td>0.793178</td><td>0.122409</td></tr> </tbody> </table>                                                                                                                                                                                                                                                                                                                                                                                                                                                                                                                                                                                                                                                                                                                                                                | Tag      | Symbol | X | Y | Z | 1 | C | 0.73939  | -0.63176 | -0.20994 | 2 | C | -0.10165 | -1.73097 | -0.02759 | 3 | C | -1.48211 | -1.57421 | 0.098362 | 4 | C | -2.04776 | -0.3077  | 0.040048 | 5 | C | -1.21145 | 0.803628 | -0.13994 | 6 | C | 0.162621 | 0.643837 | -0.26028 | 7 | H | 0.322147 | -2.72843 | 0.014124 | 8 | H | -2.13309 | -2.42797 | 0.243621 | 9 | H | 0.791984 | 1.51783  | -0.40324 | 10 | O | -3.39712 | -0.15171 | 0.157421 | 11 | H | -3.59587 | 0.793178 | 0.122409 | -499.877902 | 0.170328 | 2        |         |          |    |   |          |          |          |    |   |          |         |          |    |   |          |          |          |    |   |          |          |          |    |   |          |          |          |    |   |          |          |          |    |   |          |          |          |    |   |          |         |          |             |          |   |
| Tag | Symbol      | X                                                                                  | Y                                                                                                                                                                                                                                                                                                                                                                                                                                                                                                                                                                                                                                                                                                                                                                                                                                                                                                                                                                                                                                                                                                                                                                                                                                                                                                                                                                                                                                                                                                                                                                                                                                                                                                                                                                                                                               | Z        |        |   |   |   |   |   |          |          |          |   |   |          |          |          |   |   |          |          |          |   |   |          |          |          |   |   |          |          |          |   |   |          |          |          |   |   |          |          |          |   |   |          |          |          |   |   |          |          |          |    |   |          |          |          |    |   |          |          |          |             |          |          |         |          |    |   |          |          |          |    |   |          |         |          |    |   |          |          |          |    |   |          |          |          |    |   |          |          |          |    |   |          |          |          |    |   |          |          |          |    |   |          |         |          |             |          |   |
| 1   | C           | 0.73939                                                                            | -0.63176                                                                                                                                                                                                                                                                                                                                                                                                                                                                                                                                                                                                                                                                                                                                                                                                                                                                                                                                                                                                                                                                                                                                                                                                                                                                                                                                                                                                                                                                                                                                                                                                                                                                                                                                                                                                                        | -0.20994 |        |   |   |   |   |   |          |          |          |   |   |          |          |          |   |   |          |          |          |   |   |          |          |          |   |   |          |          |          |   |   |          |          |          |   |   |          |          |          |   |   |          |          |          |   |   |          |          |          |    |   |          |          |          |    |   |          |          |          |             |          |          |         |          |    |   |          |          |          |    |   |          |         |          |    |   |          |          |          |    |   |          |          |          |    |   |          |          |          |    |   |          |          |          |    |   |          |          |          |    |   |          |         |          |             |          |   |
| 2   | C           | -0.10165                                                                           | -1.73097                                                                                                                                                                                                                                                                                                                                                                                                                                                                                                                                                                                                                                                                                                                                                                                                                                                                                                                                                                                                                                                                                                                                                                                                                                                                                                                                                                                                                                                                                                                                                                                                                                                                                                                                                                                                                        | -0.02759 |        |   |   |   |   |   |          |          |          |   |   |          |          |          |   |   |          |          |          |   |   |          |          |          |   |   |          |          |          |   |   |          |          |          |   |   |          |          |          |   |   |          |          |          |   |   |          |          |          |    |   |          |          |          |    |   |          |          |          |             |          |          |         |          |    |   |          |          |          |    |   |          |         |          |    |   |          |          |          |    |   |          |          |          |    |   |          |          |          |    |   |          |          |          |    |   |          |          |          |    |   |          |         |          |             |          |   |
| 3   | C           | -1.48211                                                                           | -1.57421                                                                                                                                                                                                                                                                                                                                                                                                                                                                                                                                                                                                                                                                                                                                                                                                                                                                                                                                                                                                                                                                                                                                                                                                                                                                                                                                                                                                                                                                                                                                                                                                                                                                                                                                                                                                                        | 0.098362 |        |   |   |   |   |   |          |          |          |   |   |          |          |          |   |   |          |          |          |   |   |          |          |          |   |   |          |          |          |   |   |          |          |          |   |   |          |          |          |   |   |          |          |          |   |   |          |          |          |    |   |          |          |          |    |   |          |          |          |             |          |          |         |          |    |   |          |          |          |    |   |          |         |          |    |   |          |          |          |    |   |          |          |          |    |   |          |          |          |    |   |          |          |          |    |   |          |          |          |    |   |          |         |          |             |          |   |
| 4   | C           | -2.04776                                                                           | -0.3077                                                                                                                                                                                                                                                                                                                                                                                                                                                                                                                                                                                                                                                                                                                                                                                                                                                                                                                                                                                                                                                                                                                                                                                                                                                                                                                                                                                                                                                                                                                                                                                                                                                                                                                                                                                                                         | 0.040048 |        |   |   |   |   |   |          |          |          |   |   |          |          |          |   |   |          |          |          |   |   |          |          |          |   |   |          |          |          |   |   |          |          |          |   |   |          |          |          |   |   |          |          |          |   |   |          |          |          |    |   |          |          |          |    |   |          |          |          |             |          |          |         |          |    |   |          |          |          |    |   |          |         |          |    |   |          |          |          |    |   |          |          |          |    |   |          |          |          |    |   |          |          |          |    |   |          |          |          |    |   |          |         |          |             |          |   |
| 5   | C           | -1.21145                                                                           | 0.803628                                                                                                                                                                                                                                                                                                                                                                                                                                                                                                                                                                                                                                                                                                                                                                                                                                                                                                                                                                                                                                                                                                                                                                                                                                                                                                                                                                                                                                                                                                                                                                                                                                                                                                                                                                                                                        | -0.13994 |        |   |   |   |   |   |          |          |          |   |   |          |          |          |   |   |          |          |          |   |   |          |          |          |   |   |          |          |          |   |   |          |          |          |   |   |          |          |          |   |   |          |          |          |   |   |          |          |          |    |   |          |          |          |    |   |          |          |          |             |          |          |         |          |    |   |          |          |          |    |   |          |         |          |    |   |          |          |          |    |   |          |          |          |    |   |          |          |          |    |   |          |          |          |    |   |          |          |          |    |   |          |         |          |             |          |   |
| 6   | C           | 0.162621                                                                           | 0.643837                                                                                                                                                                                                                                                                                                                                                                                                                                                                                                                                                                                                                                                                                                                                                                                                                                                                                                                                                                                                                                                                                                                                                                                                                                                                                                                                                                                                                                                                                                                                                                                                                                                                                                                                                                                                                        | -0.26028 |        |   |   |   |   |   |          |          |          |   |   |          |          |          |   |   |          |          |          |   |   |          |          |          |   |   |          |          |          |   |   |          |          |          |   |   |          |          |          |   |   |          |          |          |   |   |          |          |          |    |   |          |          |          |    |   |          |          |          |             |          |          |         |          |    |   |          |          |          |    |   |          |         |          |    |   |          |          |          |    |   |          |          |          |    |   |          |          |          |    |   |          |          |          |    |   |          |          |          |    |   |          |         |          |             |          |   |
| 7   | H           | 0.322147                                                                           | -2.72843                                                                                                                                                                                                                                                                                                                                                                                                                                                                                                                                                                                                                                                                                                                                                                                                                                                                                                                                                                                                                                                                                                                                                                                                                                                                                                                                                                                                                                                                                                                                                                                                                                                                                                                                                                                                                        | 0.014124 |        |   |   |   |   |   |          |          |          |   |   |          |          |          |   |   |          |          |          |   |   |          |          |          |   |   |          |          |          |   |   |          |          |          |   |   |          |          |          |   |   |          |          |          |   |   |          |          |          |    |   |          |          |          |    |   |          |          |          |             |          |          |         |          |    |   |          |          |          |    |   |          |         |          |    |   |          |          |          |    |   |          |          |          |    |   |          |          |          |    |   |          |          |          |    |   |          |          |          |    |   |          |         |          |             |          |   |
| 8   | H           | -2.13309                                                                           | -2.42797                                                                                                                                                                                                                                                                                                                                                                                                                                                                                                                                                                                                                                                                                                                                                                                                                                                                                                                                                                                                                                                                                                                                                                                                                                                                                                                                                                                                                                                                                                                                                                                                                                                                                                                                                                                                                        | 0.243621 |        |   |   |   |   |   |          |          |          |   |   |          |          |          |   |   |          |          |          |   |   |          |          |          |   |   |          |          |          |   |   |          |          |          |   |   |          |          |          |   |   |          |          |          |   |   |          |          |          |    |   |          |          |          |    |   |          |          |          |             |          |          |         |          |    |   |          |          |          |    |   |          |         |          |    |   |          |          |          |    |   |          |          |          |    |   |          |          |          |    |   |          |          |          |    |   |          |          |          |    |   |          |         |          |             |          |   |
| 9   | H           | 0.791984                                                                           | 1.51783                                                                                                                                                                                                                                                                                                                                                                                                                                                                                                                                                                                                                                                                                                                                                                                                                                                                                                                                                                                                                                                                                                                                                                                                                                                                                                                                                                                                                                                                                                                                                                                                                                                                                                                                                                                                                         | -0.40324 |        |   |   |   |   |   |          |          |          |   |   |          |          |          |   |   |          |          |          |   |   |          |          |          |   |   |          |          |          |   |   |          |          |          |   |   |          |          |          |   |   |          |          |          |   |   |          |          |          |    |   |          |          |          |    |   |          |          |          |             |          |          |         |          |    |   |          |          |          |    |   |          |         |          |    |   |          |          |          |    |   |          |          |          |    |   |          |          |          |    |   |          |          |          |    |   |          |          |          |    |   |          |         |          |             |          |   |
| 10  | O           | -3.39712                                                                           | -0.15171                                                                                                                                                                                                                                                                                                                                                                                                                                                                                                                                                                                                                                                                                                                                                                                                                                                                                                                                                                                                                                                                                                                                                                                                                                                                                                                                                                                                                                                                                                                                                                                                                                                                                                                                                                                                                        | 0.157421 |        |   |   |   |   |   |          |          |          |   |   |          |          |          |   |   |          |          |          |   |   |          |          |          |   |   |          |          |          |   |   |          |          |          |   |   |          |          |          |   |   |          |          |          |   |   |          |          |          |    |   |          |          |          |    |   |          |          |          |             |          |          |         |          |    |   |          |          |          |    |   |          |         |          |    |   |          |          |          |    |   |          |          |          |    |   |          |          |          |    |   |          |          |          |    |   |          |          |          |    |   |          |         |          |             |          |   |
| 11  | H           | -3.59587                                                                           | 0.793178                                                                                                                                                                                                                                                                                                                                                                                                                                                                                                                                                                                                                                                                                                                                                                                                                                                                                                                                                                                                                                                                                                                                                                                                                                                                                                                                                                                                                                                                                                                                                                                                                                                                                                                                                                                                                        | 0.122409 |        |   |   |   |   |   |          |          |          |   |   |          |          |          |   |   |          |          |          |   |   |          |          |          |   |   |          |          |          |   |   |          |          |          |   |   |          |          |          |   |   |          |          |          |   |   |          |          |          |    |   |          |          |          |    |   |          |          |          |             |          |          |         |          |    |   |          |          |          |    |   |          |         |          |    |   |          |          |          |    |   |          |          |          |    |   |          |          |          |    |   |          |          |          |    |   |          |          |          |    |   |          |         |          |             |          |   |

|    |       |  |      |          |          |          |          |             |          |   |
|----|-------|--|------|----------|----------|----------|----------|-------------|----------|---|
|    |       |  | 12 O | -1.86381 | 2.01741  | -0.21859 |          |             |          |   |
|    |       |  | 13 C | 2.236807 | -0.81111 | -0.40305 |          |             |          |   |
|    |       |  | 14 H | 2.479308 | -1.86583 | -0.22926 |          |             |          |   |
|    |       |  | 15 H | 2.505211 | -0.60034 | -1.44502 |          |             |          |   |
|    |       |  | 16 C | 3.08163  | 0.041377 | 0.506095 |          |             |          |   |
|    |       |  | 17 H | 2.908031 | -0.09036 | 1.572701 |          |             |          |   |
|    |       |  | 18 C | 3.997547 | 0.917642 | 0.098167 |          |             |          |   |
|    |       |  | 19 H | 4.198558 | 1.080768 | -0.95685 |          |             |          |   |
|    |       |  | 20 H | 4.584259 | 1.496582 | 0.802677 |          |             |          |   |
|    |       |  | 21 H | -1.22243 | 2.74877  | -0.09226 |          |             |          |   |
|    |       |  | 22 H | -1.0008  | 1.045781 | 2.649219 |          |             |          |   |
| 5. | TS1_1 |  | Tag  | Symbol   | X        | Y        | Z        | -499.871827 | 0.171321 | 2 |
|    |       |  | 1    | C        | 0.744804 | -0.62486 | -0.20837 |             |          |   |
|    |       |  | 2    | C        | -0.10058 | -1.72957 | -0.02633 |             |          |   |
|    |       |  | 3    | C        | -1.48114 | -1.58254 | 0.094366 |             |          |   |
|    |       |  | 4    | C        | -2.04813 | -0.31633 | 0.064662 |             |          |   |
|    |       |  | 5    | C        | -1.20249 | 0.817547 | -0.01477 |             |          |   |
|    |       |  | 6    | C        | 0.17475  | 0.643268 | -0.24548 |             |          |   |
|    |       |  | 7    | H        | 0.325856 | -2.72651 | 0.000483 |             |          |   |
|    |       |  | 8    | H        | -2.13019 | -2.44298 | 0.202908 |             |          |   |
|    |       |  | 9    | H        | 0.794054 | 1.521458 | -0.39549 |             |          |   |
|    |       |  | 10   | O        | -3.38964 | -0.15719 | 0.15605  |             |          |   |
|    |       |  | 11   | H        | -3.57875 | 0.790621 | 0.099462 |             |          |   |
|    |       |  | 12   | O        | -1.86428 | 2.014032 | -0.26087 |             |          |   |
|    |       |  | 13   | C        | 2.241632 | -0.80831 | -0.40713 |             |          |   |
|    |       |  | 14   | H        | 2.483576 | -1.86363 | -0.23653 |             |          |   |
|    |       |  | 15   | H        | 2.50835  | -0.59475 | -1.44867 |             |          |   |
|    |       |  | 16   | C        | 3.083351 | 0.043378 | 0.506254 |             |          |   |
|    |       |  | 17   | H        | 2.905697 | -0.09006 | 1.571836 |             |          |   |
|    |       |  | 18   | C        | 3.998357 | 0.922208 | 0.102536 |             |          |   |
|    |       |  | 19   | H        | 4.202475 | 1.087941 | -0.95144 |             |          |   |
|    |       |  | 20   | H        | 4.580619 | 1.501695 | 0.810164 |             |          |   |
|    |       |  | 21   | H        | -1.41497 | 2.73651  | 0.190594 |             |          |   |

|    |     |                                                                                   |     |        |          |          |          |             |          |   |
|----|-----|-----------------------------------------------------------------------------------|-----|--------|----------|----------|----------|-------------|----------|---|
| 6. | 1_c | 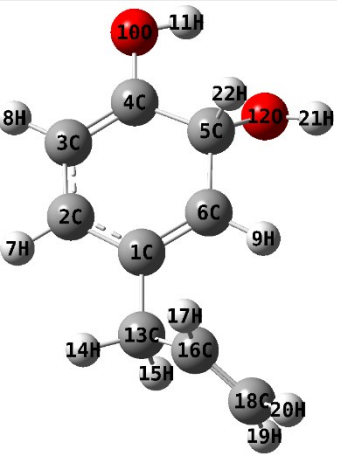 | 22  | H      | -1.10865 | 1.036309 | 1.800812 |             |          |   |
|    |     |                                                                                   | Tag | Symbol | X        | Y        | Z        | -499.911569 | 0.178628 | 2 |
|    |     |                                                                                   | 1   | C      | -0.74144 | 0.59573  | -0.14116 |             |          |   |
|    |     |                                                                                   | 2   | C      | 0.126487 | 1.724622 | -0.12249 |             |          |   |
|    |     |                                                                                   | 3   | C      | 1.520957 | 1.569703 | 0.001149 |             |          |   |
|    |     |                                                                                   | 4   | C      | 2.065985 | 0.325678 | 0.152301 |             |          |   |
|    |     |                                                                                   | 5   | C      | 1.222664 | -0.90262 | 0.313857 |             |          |   |
|    |     |                                                                                   | 6   | C      | -0.22638 | -0.65745 | 0.038498 |             |          |   |
|    |     |                                                                                   | 7   | H      | -0.28762 | 2.717566 | -0.25617 |             |          |   |
|    |     |                                                                                   | 8   | H      | 2.182178 | 2.42774  | -0.06352 |             |          |   |
|    |     |                                                                                   | 9   | H      | -0.87867 | -1.52469 | 0.046112 |             |          |   |
|    |     |                                                                                   | 10  | O      | 3.407577 | 0.14409  | 0.218078 |             |          |   |
|    |     |                                                                                   | 11  | H      | 3.580454 | -0.78844 | 0.021511 |             |          |   |
|    |     |                                                                                   | 12  | O      | 1.832417 | -1.92078 | -0.53706 |             |          |   |
|    |     |                                                                                   | 13  | C      | -2.22869 | 0.806972 | -0.39879 |             |          |   |
|    |     |                                                                                   | 14  | H      | -2.45586 | 1.867717 | -0.23949 |             |          |   |
|    |     |                                                                                   | 15  | H      | -2.45015 | 0.599671 | -1.4521  |             |          |   |
|    |     |                                                                                   | 16  | C      | -3.13179 | -0.01841 | 0.47654  |             |          |   |
|    |     |                                                                                   | 17  | H      | -3.01125 | 0.129453 | 1.548533 |             |          |   |
|    |     |                                                                                   | 18  | C      | -4.04085 | -0.8868  | 0.03835  |             |          |   |
|    |     |                                                                                   | 19  | H      | -4.18965 | -1.06818 | -1.0223  |             |          |   |
|    |     |                                                                                   | 20  | H      | -4.67228 | -1.44249 | 0.722704 |             |          |   |
|    |     |                                                                                   | 21  | H      | 1.513968 | -2.78509 | -0.25748 |             |          |   |
|    |     |                                                                                   | 22  | H      | 1.34725  | -1.26429 | 1.354577 |             |          |   |

| 7.  | 1_d    |          | <table border="1"> <thead> <tr> <th>Tag</th> <th>Symbol</th> <th>X</th> <th>Y</th> <th>Z</th> </tr> </thead> <tbody> <tr><td>1</td><td>C</td><td>-0.48672</td><td>0.424542</td><td>-0.2363</td></tr> <tr><td>2</td><td>C</td><td>0.465985</td><td>1.423857</td><td>-0.0131</td></tr> <tr><td>3</td><td>C</td><td>1.817641</td><td>1.125561</td><td>0.133636</td></tr> <tr><td>4</td><td>C</td><td>2.242501</td><td>-0.1995</td><td>0.059562</td></tr> <tr><td>5</td><td>C</td><td>1.309117</td><td>-1.21405</td><td>-0.15959</td></tr> <tr><td>6</td><td>C</td><td>-0.03948</td><td>-0.89837</td><td>-0.30289</td></tr> <tr><td>7</td><td>H</td><td>0.147763</td><td>2.460043</td><td>0.045306</td></tr> <tr><td>8</td><td>H</td><td>2.549389</td><td>1.90556</td><td>0.306391</td></tr> <tr><td>9</td><td>H</td><td>-0.7548</td><td>-1.69785</td><td>-0.46432</td></tr> <tr><td>10</td><td>O</td><td>3.58254</td><td>-0.4461</td><td>0.210474</td></tr> <tr><td>11</td><td>H</td><td>3.748277</td><td>-1.39175</td><td>0.139352</td></tr> <tr><td>12</td><td>C</td><td>-1.95791</td><td>0.763258</td><td>-0.41699</td></tr> <tr><td>13</td><td>H</td><td>-2.08334</td><td>1.842322</td><td>-0.27009</td></tr> <tr><td>14</td><td>H</td><td>-2.26785</td><td>0.552935</td><td>-1.44724</td></tr> <tr><td>15</td><td>C</td><td>-2.86781</td><td>0.029143</td><td>0.53315</td></tr> <tr><td>16</td><td>H</td><td>-2.6566</td><td>0.170749</td><td>1.59165</td></tr> <tr><td>17</td><td>C</td><td>-3.87664</td><td>-0.76007</td><td>0.16989</td></tr> <tr><td>18</td><td>H</td><td>-4.11626</td><td>-0.93177</td><td>-0.87561</td></tr> <tr><td>19</td><td>H</td><td>-4.50119</td><td>-1.25848</td><td>0.902808</td></tr> <tr><td>20</td><td>H</td><td>1.634253</td><td>-2.24921</td><td>-0.21626</td></tr> </tbody> </table> | Tag      | Symbol | X | Y | Z | 1 | C | -0.48672 | 0.424542 | -0.2363 | 2 | C | 0.465985 | 1.423857 | -0.0131 | 3 | C | 1.817641 | 1.125561 | 0.133636 | 4 | C | 2.242501 | -0.1995 | 0.059562 | 5 | C | 1.309117 | -1.21405 | -0.15959 | 6 | C | -0.03948 | -0.89837 | -0.30289 | 7 | H | 0.147763 | 2.460043 | 0.045306 | 8 | H | 2.549389 | 1.90556 | 0.306391 | 9 | H | -0.7548 | -1.69785 | -0.46432 | 10 | O | 3.58254 | -0.4461 | 0.210474 | 11 | H | 3.748277 | -1.39175 | 0.139352 | 12 | C | -1.95791 | 0.763258 | -0.41699 | 13 | H | -2.08334 | 1.842322 | -0.27009 | 14 | H | -2.26785 | 0.552935 | -1.44724 | 15 | C | -2.86781 | 0.029143 | 0.53315 | 16 | H | -2.6566 | 0.170749 | 1.59165 | 17 | C | -3.87664 | -0.76007 | 0.16989 | 18 | H | -4.11626 | -0.93177 | -0.87561 | 19 | H | -4.50119 | -1.25848 | 0.902808 | 20 | H | 1.634253 | -2.24921 | -0.21626 | -424.133012 | 0.164921 | 1 |
|-----|--------|----------|----------------------------------------------------------------------------------------------------------------------------------------------------------------------------------------------------------------------------------------------------------------------------------------------------------------------------------------------------------------------------------------------------------------------------------------------------------------------------------------------------------------------------------------------------------------------------------------------------------------------------------------------------------------------------------------------------------------------------------------------------------------------------------------------------------------------------------------------------------------------------------------------------------------------------------------------------------------------------------------------------------------------------------------------------------------------------------------------------------------------------------------------------------------------------------------------------------------------------------------------------------------------------------------------------------------------------------------------------------------------------------------------------------------------------------------------------------------------------------------------------------------------------------------------------------------------------------------------------------------------------------------------------------------------------------------------------------------------------------------------------------------------------------------------------------------------------|----------|--------|---|---|---|---|---|----------|----------|---------|---|---|----------|----------|---------|---|---|----------|----------|----------|---|---|----------|---------|----------|---|---|----------|----------|----------|---|---|----------|----------|----------|---|---|----------|----------|----------|---|---|----------|---------|----------|---|---|---------|----------|----------|----|---|---------|---------|----------|----|---|----------|----------|----------|----|---|----------|----------|----------|----|---|----------|----------|----------|----|---|----------|----------|----------|----|---|----------|----------|---------|----|---|---------|----------|---------|----|---|----------|----------|---------|----|---|----------|----------|----------|----|---|----------|----------|----------|----|---|----------|----------|----------|-------------|----------|---|
| Tag | Symbol | X        | Y                                                                                                                                                                                                                                                                                                                                                                                                                                                                                                                                                                                                                                                                                                                                                                                                                                                                                                                                                                                                                                                                                                                                                                                                                                                                                                                                                                                                                                                                                                                                                                                                                                                                                                                                                                                                                          | Z        |        |   |   |   |   |   |          |          |         |   |   |          |          |         |   |   |          |          |          |   |   |          |         |          |   |   |          |          |          |   |   |          |          |          |   |   |          |          |          |   |   |          |         |          |   |   |         |          |          |    |   |         |         |          |    |   |          |          |          |    |   |          |          |          |    |   |          |          |          |    |   |          |          |          |    |   |          |          |         |    |   |         |          |         |    |   |          |          |         |    |   |          |          |          |    |   |          |          |          |    |   |          |          |          |             |          |   |
| 1   | C      | -0.48672 | 0.424542                                                                                                                                                                                                                                                                                                                                                                                                                                                                                                                                                                                                                                                                                                                                                                                                                                                                                                                                                                                                                                                                                                                                                                                                                                                                                                                                                                                                                                                                                                                                                                                                                                                                                                                                                                                                                   | -0.2363  |        |   |   |   |   |   |          |          |         |   |   |          |          |         |   |   |          |          |          |   |   |          |         |          |   |   |          |          |          |   |   |          |          |          |   |   |          |          |          |   |   |          |         |          |   |   |         |          |          |    |   |         |         |          |    |   |          |          |          |    |   |          |          |          |    |   |          |          |          |    |   |          |          |          |    |   |          |          |         |    |   |         |          |         |    |   |          |          |         |    |   |          |          |          |    |   |          |          |          |    |   |          |          |          |             |          |   |
| 2   | C      | 0.465985 | 1.423857                                                                                                                                                                                                                                                                                                                                                                                                                                                                                                                                                                                                                                                                                                                                                                                                                                                                                                                                                                                                                                                                                                                                                                                                                                                                                                                                                                                                                                                                                                                                                                                                                                                                                                                                                                                                                   | -0.0131  |        |   |   |   |   |   |          |          |         |   |   |          |          |         |   |   |          |          |          |   |   |          |         |          |   |   |          |          |          |   |   |          |          |          |   |   |          |          |          |   |   |          |         |          |   |   |         |          |          |    |   |         |         |          |    |   |          |          |          |    |   |          |          |          |    |   |          |          |          |    |   |          |          |          |    |   |          |          |         |    |   |         |          |         |    |   |          |          |         |    |   |          |          |          |    |   |          |          |          |    |   |          |          |          |             |          |   |
| 3   | C      | 1.817641 | 1.125561                                                                                                                                                                                                                                                                                                                                                                                                                                                                                                                                                                                                                                                                                                                                                                                                                                                                                                                                                                                                                                                                                                                                                                                                                                                                                                                                                                                                                                                                                                                                                                                                                                                                                                                                                                                                                   | 0.133636 |        |   |   |   |   |   |          |          |         |   |   |          |          |         |   |   |          |          |          |   |   |          |         |          |   |   |          |          |          |   |   |          |          |          |   |   |          |          |          |   |   |          |         |          |   |   |         |          |          |    |   |         |         |          |    |   |          |          |          |    |   |          |          |          |    |   |          |          |          |    |   |          |          |          |    |   |          |          |         |    |   |         |          |         |    |   |          |          |         |    |   |          |          |          |    |   |          |          |          |    |   |          |          |          |             |          |   |
| 4   | C      | 2.242501 | -0.1995                                                                                                                                                                                                                                                                                                                                                                                                                                                                                                                                                                                                                                                                                                                                                                                                                                                                                                                                                                                                                                                                                                                                                                                                                                                                                                                                                                                                                                                                                                                                                                                                                                                                                                                                                                                                                    | 0.059562 |        |   |   |   |   |   |          |          |         |   |   |          |          |         |   |   |          |          |          |   |   |          |         |          |   |   |          |          |          |   |   |          |          |          |   |   |          |          |          |   |   |          |         |          |   |   |         |          |          |    |   |         |         |          |    |   |          |          |          |    |   |          |          |          |    |   |          |          |          |    |   |          |          |          |    |   |          |          |         |    |   |         |          |         |    |   |          |          |         |    |   |          |          |          |    |   |          |          |          |    |   |          |          |          |             |          |   |
| 5   | C      | 1.309117 | -1.21405                                                                                                                                                                                                                                                                                                                                                                                                                                                                                                                                                                                                                                                                                                                                                                                                                                                                                                                                                                                                                                                                                                                                                                                                                                                                                                                                                                                                                                                                                                                                                                                                                                                                                                                                                                                                                   | -0.15959 |        |   |   |   |   |   |          |          |         |   |   |          |          |         |   |   |          |          |          |   |   |          |         |          |   |   |          |          |          |   |   |          |          |          |   |   |          |          |          |   |   |          |         |          |   |   |         |          |          |    |   |         |         |          |    |   |          |          |          |    |   |          |          |          |    |   |          |          |          |    |   |          |          |          |    |   |          |          |         |    |   |         |          |         |    |   |          |          |         |    |   |          |          |          |    |   |          |          |          |    |   |          |          |          |             |          |   |
| 6   | C      | -0.03948 | -0.89837                                                                                                                                                                                                                                                                                                                                                                                                                                                                                                                                                                                                                                                                                                                                                                                                                                                                                                                                                                                                                                                                                                                                                                                                                                                                                                                                                                                                                                                                                                                                                                                                                                                                                                                                                                                                                   | -0.30289 |        |   |   |   |   |   |          |          |         |   |   |          |          |         |   |   |          |          |          |   |   |          |         |          |   |   |          |          |          |   |   |          |          |          |   |   |          |          |          |   |   |          |         |          |   |   |         |          |          |    |   |         |         |          |    |   |          |          |          |    |   |          |          |          |    |   |          |          |          |    |   |          |          |          |    |   |          |          |         |    |   |         |          |         |    |   |          |          |         |    |   |          |          |          |    |   |          |          |          |    |   |          |          |          |             |          |   |
| 7   | H      | 0.147763 | 2.460043                                                                                                                                                                                                                                                                                                                                                                                                                                                                                                                                                                                                                                                                                                                                                                                                                                                                                                                                                                                                                                                                                                                                                                                                                                                                                                                                                                                                                                                                                                                                                                                                                                                                                                                                                                                                                   | 0.045306 |        |   |   |   |   |   |          |          |         |   |   |          |          |         |   |   |          |          |          |   |   |          |         |          |   |   |          |          |          |   |   |          |          |          |   |   |          |          |          |   |   |          |         |          |   |   |         |          |          |    |   |         |         |          |    |   |          |          |          |    |   |          |          |          |    |   |          |          |          |    |   |          |          |          |    |   |          |          |         |    |   |         |          |         |    |   |          |          |         |    |   |          |          |          |    |   |          |          |          |    |   |          |          |          |             |          |   |
| 8   | H      | 2.549389 | 1.90556                                                                                                                                                                                                                                                                                                                                                                                                                                                                                                                                                                                                                                                                                                                                                                                                                                                                                                                                                                                                                                                                                                                                                                                                                                                                                                                                                                                                                                                                                                                                                                                                                                                                                                                                                                                                                    | 0.306391 |        |   |   |   |   |   |          |          |         |   |   |          |          |         |   |   |          |          |          |   |   |          |         |          |   |   |          |          |          |   |   |          |          |          |   |   |          |          |          |   |   |          |         |          |   |   |         |          |          |    |   |         |         |          |    |   |          |          |          |    |   |          |          |          |    |   |          |          |          |    |   |          |          |          |    |   |          |          |         |    |   |         |          |         |    |   |          |          |         |    |   |          |          |          |    |   |          |          |          |    |   |          |          |          |             |          |   |
| 9   | H      | -0.7548  | -1.69785                                                                                                                                                                                                                                                                                                                                                                                                                                                                                                                                                                                                                                                                                                                                                                                                                                                                                                                                                                                                                                                                                                                                                                                                                                                                                                                                                                                                                                                                                                                                                                                                                                                                                                                                                                                                                   | -0.46432 |        |   |   |   |   |   |          |          |         |   |   |          |          |         |   |   |          |          |          |   |   |          |         |          |   |   |          |          |          |   |   |          |          |          |   |   |          |          |          |   |   |          |         |          |   |   |         |          |          |    |   |         |         |          |    |   |          |          |          |    |   |          |          |          |    |   |          |          |          |    |   |          |          |          |    |   |          |          |         |    |   |         |          |         |    |   |          |          |         |    |   |          |          |          |    |   |          |          |          |    |   |          |          |          |             |          |   |
| 10  | O      | 3.58254  | -0.4461                                                                                                                                                                                                                                                                                                                                                                                                                                                                                                                                                                                                                                                                                                                                                                                                                                                                                                                                                                                                                                                                                                                                                                                                                                                                                                                                                                                                                                                                                                                                                                                                                                                                                                                                                                                                                    | 0.210474 |        |   |   |   |   |   |          |          |         |   |   |          |          |         |   |   |          |          |          |   |   |          |         |          |   |   |          |          |          |   |   |          |          |          |   |   |          |          |          |   |   |          |         |          |   |   |         |          |          |    |   |         |         |          |    |   |          |          |          |    |   |          |          |          |    |   |          |          |          |    |   |          |          |          |    |   |          |          |         |    |   |         |          |         |    |   |          |          |         |    |   |          |          |          |    |   |          |          |          |    |   |          |          |          |             |          |   |
| 11  | H      | 3.748277 | -1.39175                                                                                                                                                                                                                                                                                                                                                                                                                                                                                                                                                                                                                                                                                                                                                                                                                                                                                                                                                                                                                                                                                                                                                                                                                                                                                                                                                                                                                                                                                                                                                                                                                                                                                                                                                                                                                   | 0.139352 |        |   |   |   |   |   |          |          |         |   |   |          |          |         |   |   |          |          |          |   |   |          |         |          |   |   |          |          |          |   |   |          |          |          |   |   |          |          |          |   |   |          |         |          |   |   |         |          |          |    |   |         |         |          |    |   |          |          |          |    |   |          |          |          |    |   |          |          |          |    |   |          |          |          |    |   |          |          |         |    |   |         |          |         |    |   |          |          |         |    |   |          |          |          |    |   |          |          |          |    |   |          |          |          |             |          |   |
| 12  | C      | -1.95791 | 0.763258                                                                                                                                                                                                                                                                                                                                                                                                                                                                                                                                                                                                                                                                                                                                                                                                                                                                                                                                                                                                                                                                                                                                                                                                                                                                                                                                                                                                                                                                                                                                                                                                                                                                                                                                                                                                                   | -0.41699 |        |   |   |   |   |   |          |          |         |   |   |          |          |         |   |   |          |          |          |   |   |          |         |          |   |   |          |          |          |   |   |          |          |          |   |   |          |          |          |   |   |          |         |          |   |   |         |          |          |    |   |         |         |          |    |   |          |          |          |    |   |          |          |          |    |   |          |          |          |    |   |          |          |          |    |   |          |          |         |    |   |         |          |         |    |   |          |          |         |    |   |          |          |          |    |   |          |          |          |    |   |          |          |          |             |          |   |
| 13  | H      | -2.08334 | 1.842322                                                                                                                                                                                                                                                                                                                                                                                                                                                                                                                                                                                                                                                                                                                                                                                                                                                                                                                                                                                                                                                                                                                                                                                                                                                                                                                                                                                                                                                                                                                                                                                                                                                                                                                                                                                                                   | -0.27009 |        |   |   |   |   |   |          |          |         |   |   |          |          |         |   |   |          |          |          |   |   |          |         |          |   |   |          |          |          |   |   |          |          |          |   |   |          |          |          |   |   |          |         |          |   |   |         |          |          |    |   |         |         |          |    |   |          |          |          |    |   |          |          |          |    |   |          |          |          |    |   |          |          |          |    |   |          |          |         |    |   |         |          |         |    |   |          |          |         |    |   |          |          |          |    |   |          |          |          |    |   |          |          |          |             |          |   |
| 14  | H      | -2.26785 | 0.552935                                                                                                                                                                                                                                                                                                                                                                                                                                                                                                                                                                                                                                                                                                                                                                                                                                                                                                                                                                                                                                                                                                                                                                                                                                                                                                                                                                                                                                                                                                                                                                                                                                                                                                                                                                                                                   | -1.44724 |        |   |   |   |   |   |          |          |         |   |   |          |          |         |   |   |          |          |          |   |   |          |         |          |   |   |          |          |          |   |   |          |          |          |   |   |          |          |          |   |   |          |         |          |   |   |         |          |          |    |   |         |         |          |    |   |          |          |          |    |   |          |          |          |    |   |          |          |          |    |   |          |          |          |    |   |          |          |         |    |   |         |          |         |    |   |          |          |         |    |   |          |          |          |    |   |          |          |          |    |   |          |          |          |             |          |   |
| 15  | C      | -2.86781 | 0.029143                                                                                                                                                                                                                                                                                                                                                                                                                                                                                                                                                                                                                                                                                                                                                                                                                                                                                                                                                                                                                                                                                                                                                                                                                                                                                                                                                                                                                                                                                                                                                                                                                                                                                                                                                                                                                   | 0.53315  |        |   |   |   |   |   |          |          |         |   |   |          |          |         |   |   |          |          |          |   |   |          |         |          |   |   |          |          |          |   |   |          |          |          |   |   |          |          |          |   |   |          |         |          |   |   |         |          |          |    |   |         |         |          |    |   |          |          |          |    |   |          |          |          |    |   |          |          |          |    |   |          |          |          |    |   |          |          |         |    |   |         |          |         |    |   |          |          |         |    |   |          |          |          |    |   |          |          |          |    |   |          |          |          |             |          |   |
| 16  | H      | -2.6566  | 0.170749                                                                                                                                                                                                                                                                                                                                                                                                                                                                                                                                                                                                                                                                                                                                                                                                                                                                                                                                                                                                                                                                                                                                                                                                                                                                                                                                                                                                                                                                                                                                                                                                                                                                                                                                                                                                                   | 1.59165  |        |   |   |   |   |   |          |          |         |   |   |          |          |         |   |   |          |          |          |   |   |          |         |          |   |   |          |          |          |   |   |          |          |          |   |   |          |          |          |   |   |          |         |          |   |   |         |          |          |    |   |         |         |          |    |   |          |          |          |    |   |          |          |          |    |   |          |          |          |    |   |          |          |          |    |   |          |          |         |    |   |         |          |         |    |   |          |          |         |    |   |          |          |          |    |   |          |          |          |    |   |          |          |          |             |          |   |
| 17  | C      | -3.87664 | -0.76007                                                                                                                                                                                                                                                                                                                                                                                                                                                                                                                                                                                                                                                                                                                                                                                                                                                                                                                                                                                                                                                                                                                                                                                                                                                                                                                                                                                                                                                                                                                                                                                                                                                                                                                                                                                                                   | 0.16989  |        |   |   |   |   |   |          |          |         |   |   |          |          |         |   |   |          |          |          |   |   |          |         |          |   |   |          |          |          |   |   |          |          |          |   |   |          |          |          |   |   |          |         |          |   |   |         |          |          |    |   |         |         |          |    |   |          |          |          |    |   |          |          |          |    |   |          |          |          |    |   |          |          |          |    |   |          |          |         |    |   |         |          |         |    |   |          |          |         |    |   |          |          |          |    |   |          |          |          |    |   |          |          |          |             |          |   |
| 18  | H      | -4.11626 | -0.93177                                                                                                                                                                                                                                                                                                                                                                                                                                                                                                                                                                                                                                                                                                                                                                                                                                                                                                                                                                                                                                                                                                                                                                                                                                                                                                                                                                                                                                                                                                                                                                                                                                                                                                                                                                                                                   | -0.87561 |        |   |   |   |   |   |          |          |         |   |   |          |          |         |   |   |          |          |          |   |   |          |         |          |   |   |          |          |          |   |   |          |          |          |   |   |          |          |          |   |   |          |         |          |   |   |         |          |          |    |   |         |         |          |    |   |          |          |          |    |   |          |          |          |    |   |          |          |          |    |   |          |          |          |    |   |          |          |         |    |   |         |          |         |    |   |          |          |         |    |   |          |          |          |    |   |          |          |          |    |   |          |          |          |             |          |   |
| 19  | H      | -4.50119 | -1.25848                                                                                                                                                                                                                                                                                                                                                                                                                                                                                                                                                                                                                                                                                                                                                                                                                                                                                                                                                                                                                                                                                                                                                                                                                                                                                                                                                                                                                                                                                                                                                                                                                                                                                                                                                                                                                   | 0.902808 |        |   |   |   |   |   |          |          |         |   |   |          |          |         |   |   |          |          |          |   |   |          |         |          |   |   |          |          |          |   |   |          |          |          |   |   |          |          |          |   |   |          |         |          |   |   |         |          |          |    |   |         |         |          |    |   |          |          |          |    |   |          |          |          |    |   |          |          |          |    |   |          |          |          |    |   |          |          |         |    |   |         |          |         |    |   |          |          |         |    |   |          |          |          |    |   |          |          |          |    |   |          |          |          |             |          |   |
| 20  | H      | 1.634253 | -2.24921                                                                                                                                                                                                                                                                                                                                                                                                                                                                                                                                                                                                                                                                                                                                                                                                                                                                                                                                                                                                                                                                                                                                                                                                                                                                                                                                                                                                                                                                                                                                                                                                                                                                                                                                                                                                                   | -0.21626 |        |   |   |   |   |   |          |          |         |   |   |          |          |         |   |   |          |          |          |   |   |          |         |          |   |   |          |          |          |   |   |          |          |          |   |   |          |          |          |   |   |          |         |          |   |   |         |          |          |    |   |         |         |          |    |   |          |          |          |    |   |          |          |          |    |   |          |          |          |    |   |          |          |          |    |   |          |          |         |    |   |         |          |         |    |   |          |          |         |    |   |          |          |          |    |   |          |          |          |    |   |          |          |          |             |          |   |

**Supplementary Table 2.** The electronic energy added with zero point vibrational energy (ZPVE), ZPVE, and spin multiplicity of each structure involved in all reaction schemes of conversion of eugenol in gas phase environment at B3LYP/6-311+g(d,p) level of theory.

| S. No. | Structure Notation | Electronic Energy with ZPVE | ZPVEs    | Spin Multiplicity |
|--------|--------------------|-----------------------------|----------|-------------------|
| 1.     | EUG                | -538.658834                 | 0.197726 | 1                 |
| 2.     | 1_a                | -498.759117                 | 0.157271 | 2                 |
| 3.     | 1_b                | -499.377655                 | 0.169060 | 1                 |
| 4.     | 1_b*               | -499.877902                 | 0.170328 | 2                 |
| 5.     | TS1_1              | -499.871827                 | 0.171321 | 2                 |
| 6.     | 1_c                | -499.911569                 | 0.178628 | 2                 |
| 7.     | 1_d                | -424.133012                 | 0.164921 | 1                 |
| 8.     | 1_d*               | -424.634800                 | 0.165335 | 2                 |
| 9.     | TS1_2              | -424.624629                 | 0.166837 | 2                 |
| 10.    | 1_e                | -424.663008                 | 0.173508 | 2                 |
| 11.    | 1_f                | -348.890051                 | 0.160949 | 1                 |
| 12.    | 1_g                | -349.452204                 | 0.169058 | 2                 |
| 13.    | 1_h                | -350.103083                 | 0.184375 | 1                 |
| 14.    | EUG*               | -539.160414                 | 0.198056 | 2                 |
| 15.    | TS2_1              | -539.154112                 | 0.199705 | 2                 |
| 16.    | 2_a                | -539.194726                 | 0.206701 | 2                 |
| 17.    | TS2_2              | -539.177942                 | 0.204696 | 2                 |
| 18.    | 2_b*               | -539.209785                 | 0.203445 | 2                 |
| 19.    | 2_a1               | -421.302826                 | 0.123870 | 2                 |
| 20.    | 2_b                | -421.979934                 | 0.136977 | 1                 |
| 21.    | 3_a                | -460.643154                 | 0.151096 | 2                 |
| 22.    | 3_b                | -461.279602                 | 0.164046 | 1                 |
| 23.    | 3_b*               | -461.781254                 | 0.164448 | 2                 |
| 24.    | TS3_1              | -461.774707                 | 0.166127 | 2                 |
| 25.    | 3_c                | -461.814666                 | 0.173332 | 2                 |
| 26.    | TS3_2              | -461.799844                 | 0.171229 | 2                 |
| 27.    | 3_d                | -461.811808                 | 0.169990 | 2                 |
| 28.    | 3_d*               | -347.255983                 | 0.131660 | 2                 |
| 29.    | TS3_3              | -347.245920                 | 0.133273 | 2                 |
| 30.    | 3_e                | -347.284485                 | 0.139979 | 2                 |
| 31.    | 3_f                | -271.511507                 | 0.127307 | 1                 |
| 32.    | 3_c1               | -421.381386                 | 0.123813 | 2                 |
| 33.    | 3_c2               | -421.998469                 | 0.135403 | 1                 |
| 34.    | 3_c2*              | -422.500371                 | 0.135748 | 2                 |
| 35.    | TS3a_1             | -422.493042                 | 0.137746 | 2                 |
| 36.    | 3_c3               | -422.533349                 | 0.145300 | 2                 |
| 37.    | 4_a                | -423.456925                 | 0.152132 | 2                 |
| 38.    | 4_b                | -424.133012                 | 0.164921 | 1                 |
| 39.    | 4_c                | -424.689183                 | 0.173264 | 2                 |
| 40.    | 4_d                | -425.345861                 | 0.188349 | 1                 |
| 41.    | EUG*               | -539.160662                 | 0.197993 | 2                 |
| 42.    | TS4_1              | -539.153523                 | 0.199902 | 2                 |
| 43.    | 4_a1               | -539.193028                 | 0.206753 | 2                 |
| 44.    | TS4_2              | -539.178042                 | 0.204730 | 2                 |
| 45.    | 4_b*               | -539.190364                 | 0.203412 | 2                 |
| 46.    | 5_a                | -539.220512                 | 0.205973 | 2                 |
| 47.    | 5_b                | -539.871120                 | 0.221206 | 1                 |
| 48.    | 5_c                | -540.405965                 | 0.230285 | 2                 |
| 49.    | 5_d                | -541.012206                 | 0.243041 | 1                 |
| 50.    | 5_e                | -541.594193                 | 0.253311 | 2                 |
| 51.    | 5_f                | -542.214157                 | 0.267127 | 1                 |
| 52.    | 5_g                | -542.771374                 | 0.276054 | 2                 |
| 53.    | 5_h                | -543.424235                 | 0.291066 | 1                 |
| 54.    | 5_i                | -503.484356                 | 0.248808 | 2                 |

|     |               |             |          |   |
|-----|---------------|-------------|----------|---|
| 55. | <b>5_j</b>    | -504.142135 | 0.263336 | 1 |
| 56. | <b>5_k</b>    | -428.247798 | 0.243915 | 2 |
| 57. | <b>5_l</b>    | -428.901154 | 0.258419 | 1 |
| 58. | <b>5_m</b>    | -353.010545 | 0.239324 | 2 |
| 59. | <b>5_n</b>    | -353.661810 | 0.254001 | 1 |
| 60. | <b>6_a</b>    | -537.998589 | 0.182327 | 2 |
| 61. | <b>TS6_1</b>  | -537.975149 | 0.182017 | 2 |
| 62. | <b>6_b</b>    | -537.987833 | 0.183597 | 2 |
| 63. | <b>TS6_2</b>  | -537.987874 | 0.183307 | 2 |
| 64. | <b>6_c</b>    | -538.007079 | 0.185344 | 2 |
| 65. | <b>6_d</b>    | -538.669829 | 0.198951 | 1 |
| 66. | <b>TS6_3</b>  | -538.618426 | 0.194057 | 1 |
| 67. | <b>6_d*</b>   | -538.642892 | 0.193868 | 1 |
| 68. | <b>6_e</b>    | -462.202890 | 0.169101 | 1 |
| 69. | <b>6_f</b>    | -462.794800 | 0.178760 | 2 |
| 70. | <b>TS6_4</b>  | -462.750589 | 0.175054 | 2 |
| 71. | <b>6_g</b>    | -462.806842 | 0.179364 | 2 |
| 72. | <b>6_h</b>    | -463.432998 | 0.192219 | 1 |
| 73. | <b>6_i</b>    | -463.994855 | 0.200445 | 2 |
| 74. | <b>6_j</b>    | -464.645785 | 0.215587 | 1 |
| 75. | <b>7_a</b>    | -462.734921 | 0.180287 | 2 |
| 76. | <b>7_b</b>    | -463.414376 | 0.193206 | 1 |
| 77. | <b>7_b*</b>   | -463.916336 | 0.193360 | 2 |
| 78. | <b>TS7_1</b>  | -463.906415 | 0.195133 | 2 |
| 79. | <b>7_c</b>    | -463.943189 | 0.201646 | 2 |
| 80. | <b>TS7_2</b>  | -463.927136 | 0.199816 | 2 |
| 81. | <b>7_d*</b>   | -463.943624 | 0.198085 | 2 |
| 82. | <b>EUG^</b>   | -539.160628 | 0.198124 | 2 |
| 83. | <b>TS7_1a</b> | -539.152390 | 0.199804 | 2 |
| 84. | <b>7_a1</b>   | -539.193406 | 0.206814 | 2 |
| 85. | <b>7_c1</b>   | -423.501339 | 0.151856 | 2 |
| 86. | <b>7_c2</b>   | -424.133844 | 0.164943 | 1 |
| 87. | <b>7_c2*</b>  | -424.635615 | 0.165376 | 2 |
| 88. | <b>TS7_2a</b> | -424.624885 | 0.166928 | 2 |
| 89. | <b>7_c3</b>   | -424.661703 | 0.173569 | 2 |
| 90. | <b>7_d</b>    | -348.890051 | 0.160949 | 1 |
| 91. | <b>8_a</b>    | -538.043309 | 0.184551 | 2 |
| 92. | <b>8_b</b>    | -538.668635 | 0.197246 | 1 |
